# Supplementary material for: [Fe2L3]4+ Cylinders Derived from Bis(bidentate) 2-Pyridyl-1,2,3-triazole “Click” Ligands: Synthesis, Structures and Exploration of Biological Activity
Source: MDPI journal article supplement (doi:10.3390/molecules18066383), 2013-05-29

# Supplementary Materials

## 1. NMR Assignment Schemes

**Scheme 1.**  $^1\text{H}$ -NMR assignments for model Fe(II) complexes **5a** and **5b**.

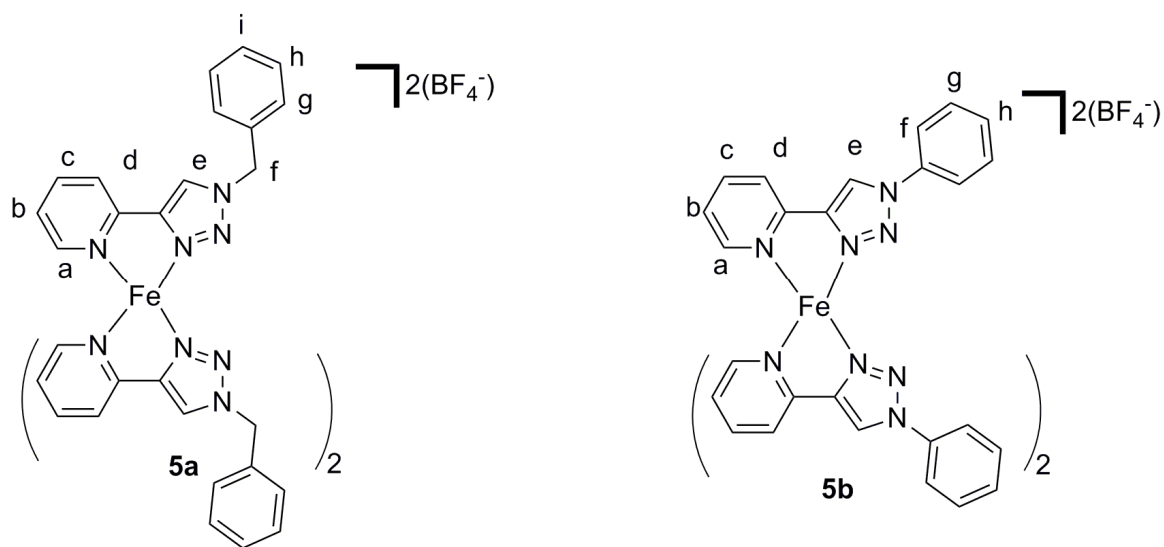

**Scheme 2.**  $^1\text{H}$ -NMR assignments for Fe(II) cylinders **6a–f** and **8**.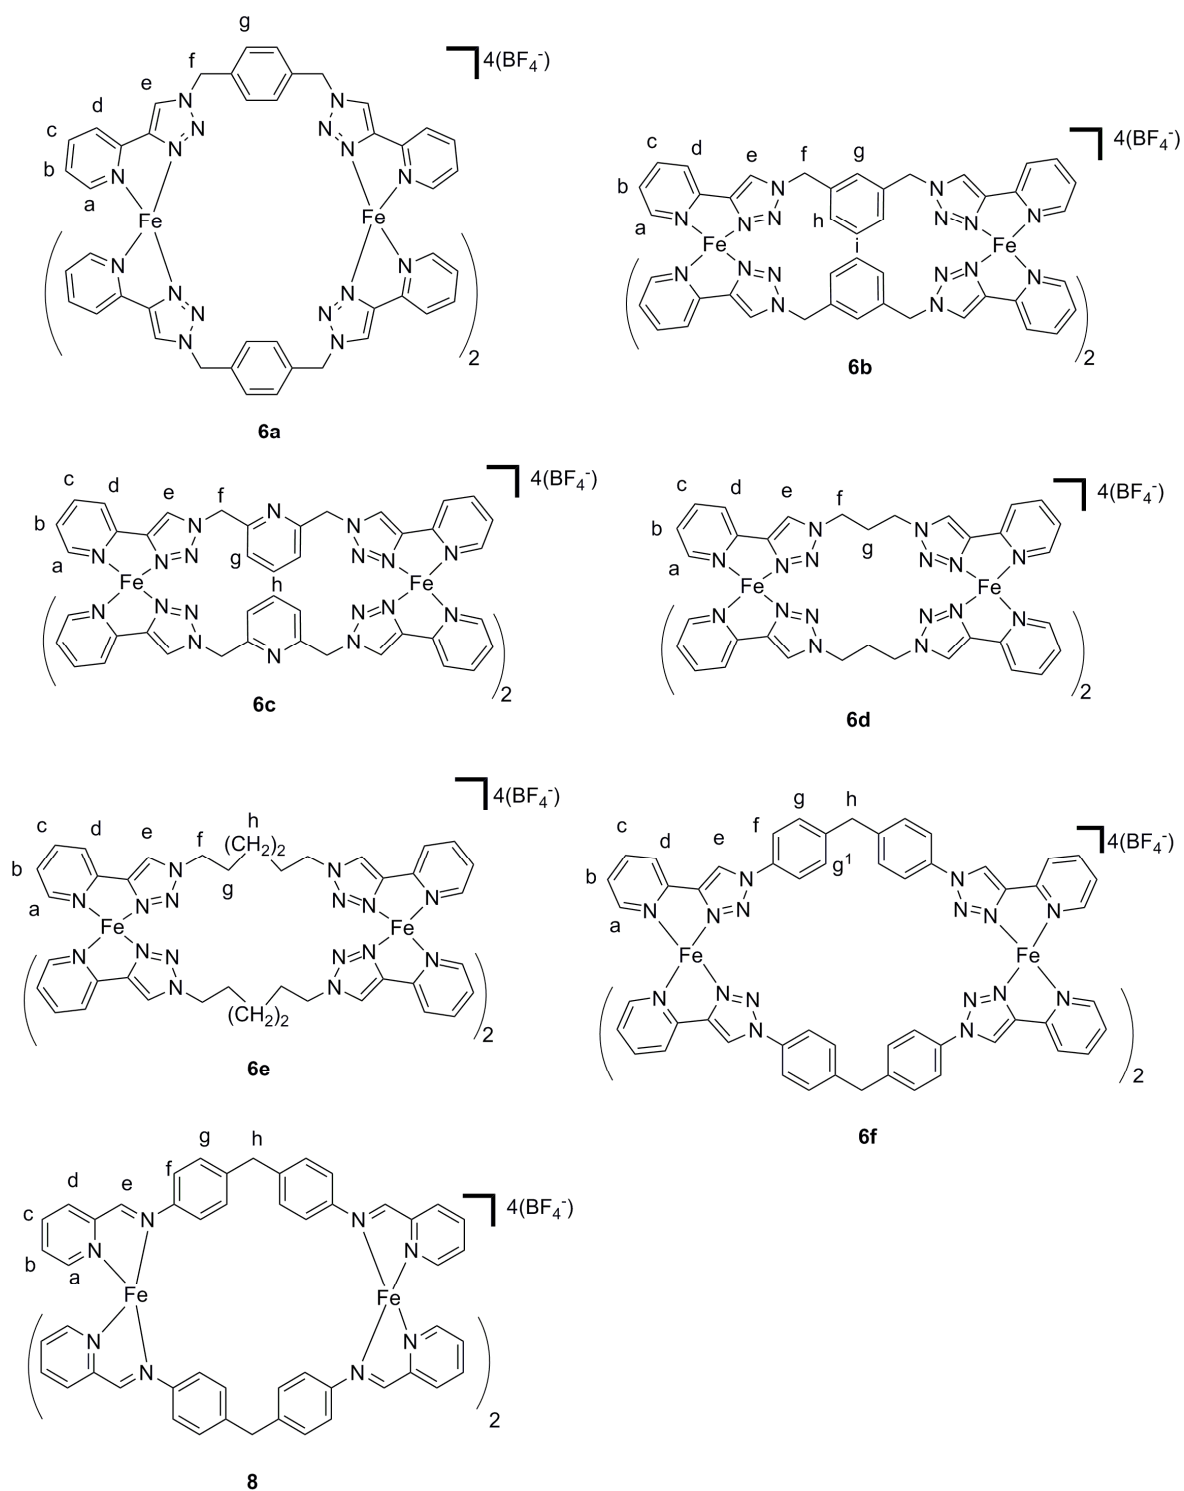

**2. NMR Spectra** **Figure S1.** Partial  $^1\text{H}$ -NMR (500 MHz,  $\text{CD}_3\text{CN}$ , 298 K) of **5a**.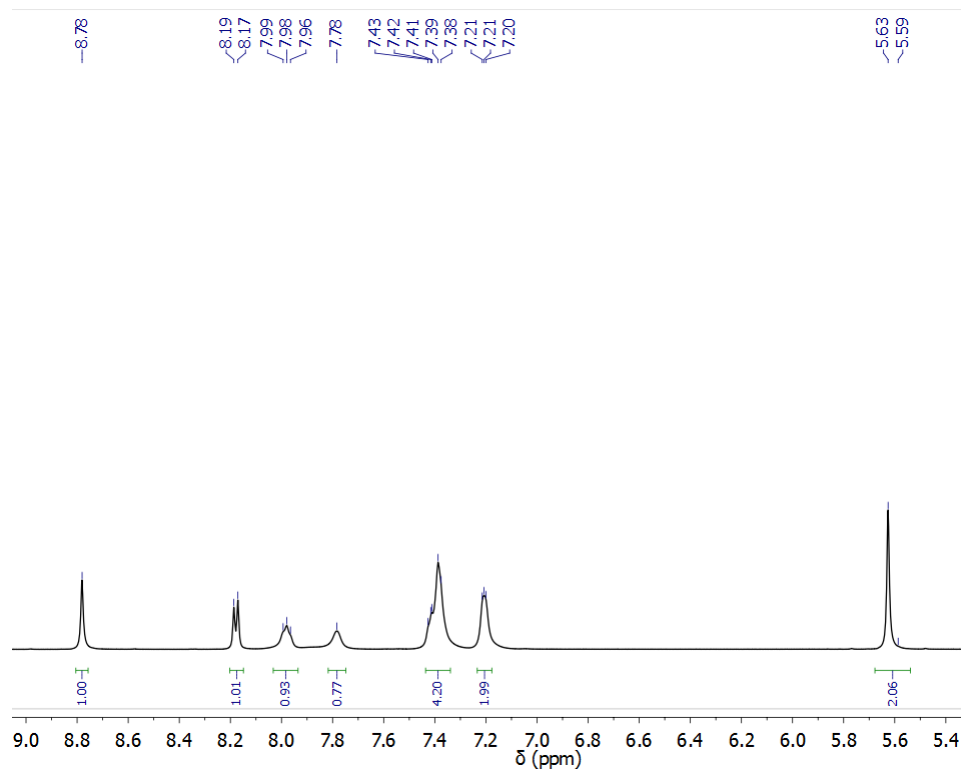

**Figure S2.** Partial  $^1\text{H}$ -NMR (500 MHz,  $\text{CD}_3\text{CN}$ , 298 K) of a) the ligand **4a** and b) the Fe(II) model complex **5a**.

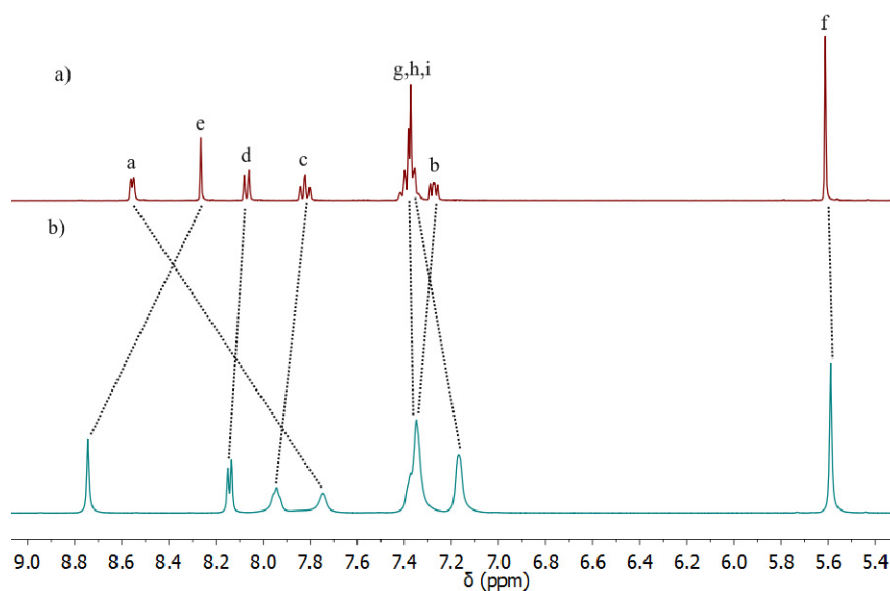

**Figure S3.** Partial  $^{13}\text{C}$ -NMR (125 MHz,  $\text{CD}_3\text{CN}$ , 298 K) of the Fe(II) model complex **5a**.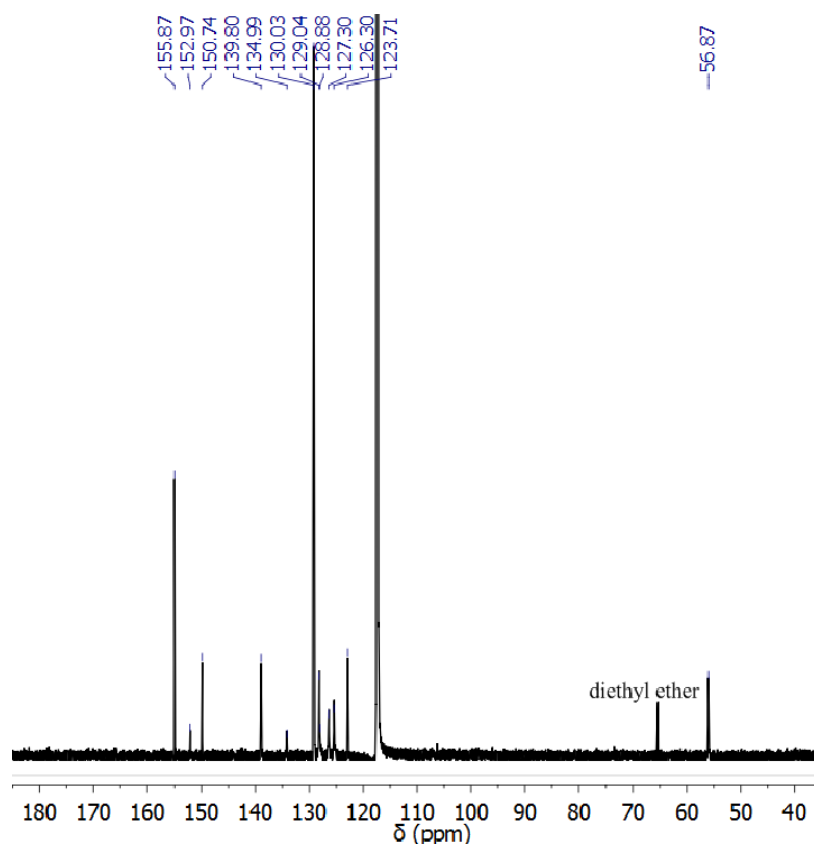**Figure S4.** Partial  $^1\text{H}$ -NMR (500 MHz,  $\text{CD}_3\text{CN}$ , 298 K) of **5b**.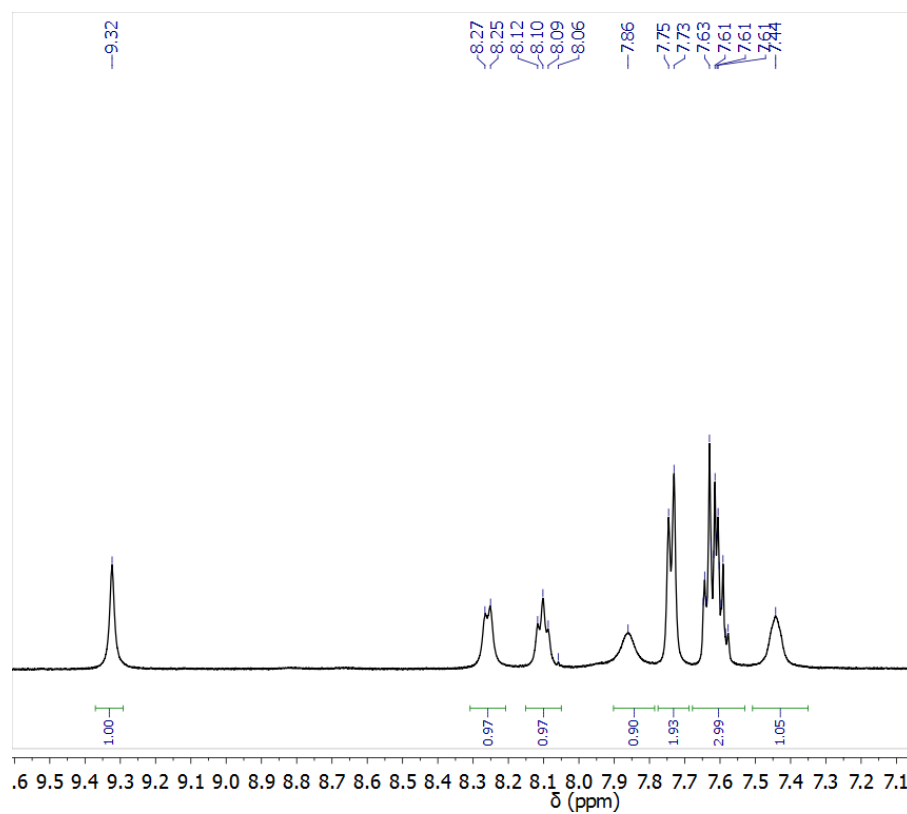

**Figure S5.** Partial  $^1\text{H}$ -NMR (500 MHz,  $\text{CD}_3\text{CN}$ , 298 K) of a) the ligand **4b** and b) the Fe(II) model complex **5b**.

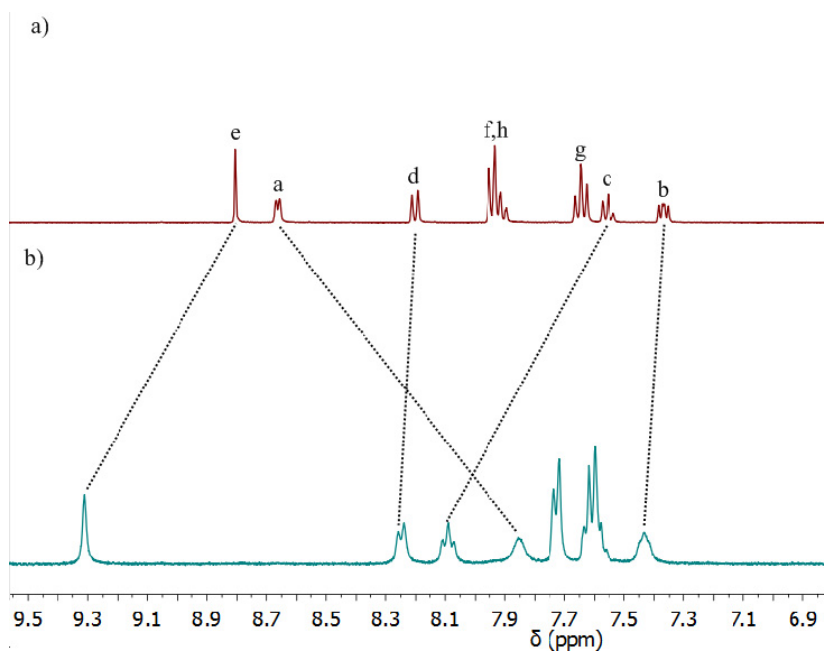

**Figure S6.** Partial  $^{13}\text{C}$ -NMR (125 MHz,  $\text{CD}_3\text{CN}$ , 298 K) of the Fe(II) model complex **5b**.

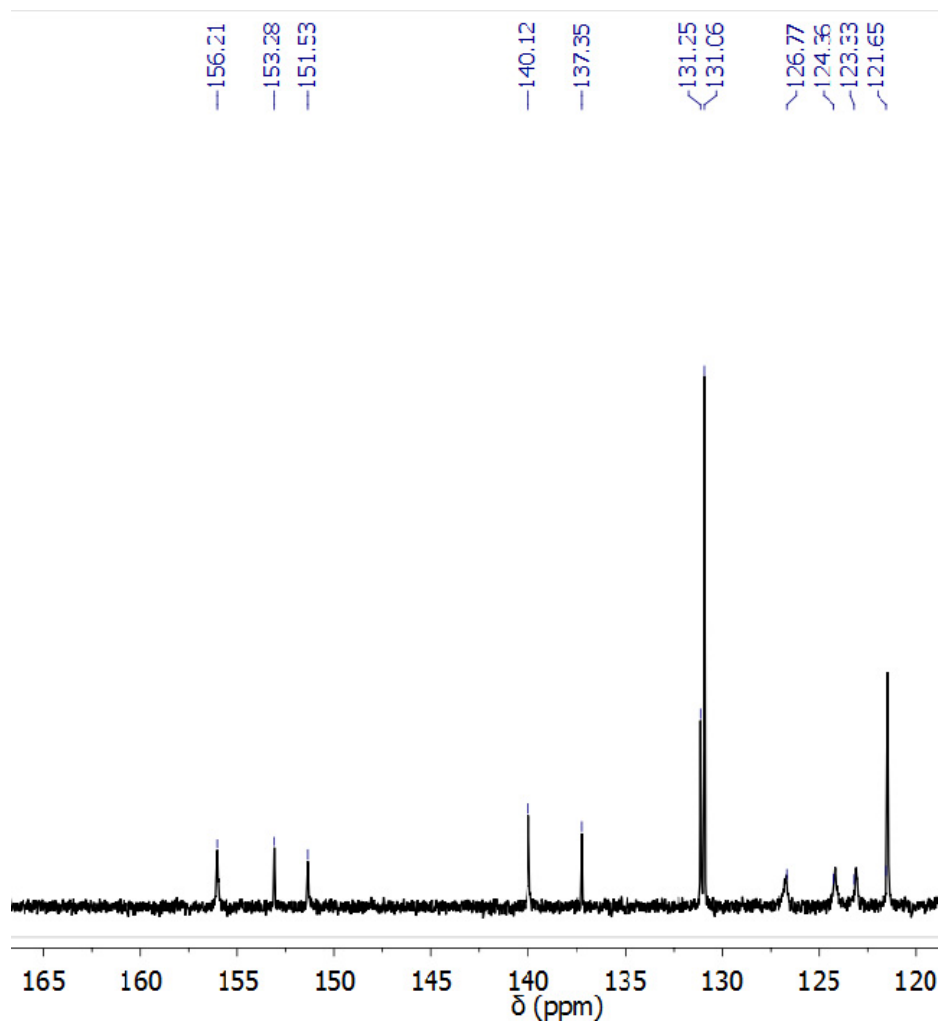

**Figure S7.** Partial  $^1\text{H}$ -NMR (500 MHz,  $\text{CD}_3\text{CN}$ , 298 K) of **6a**.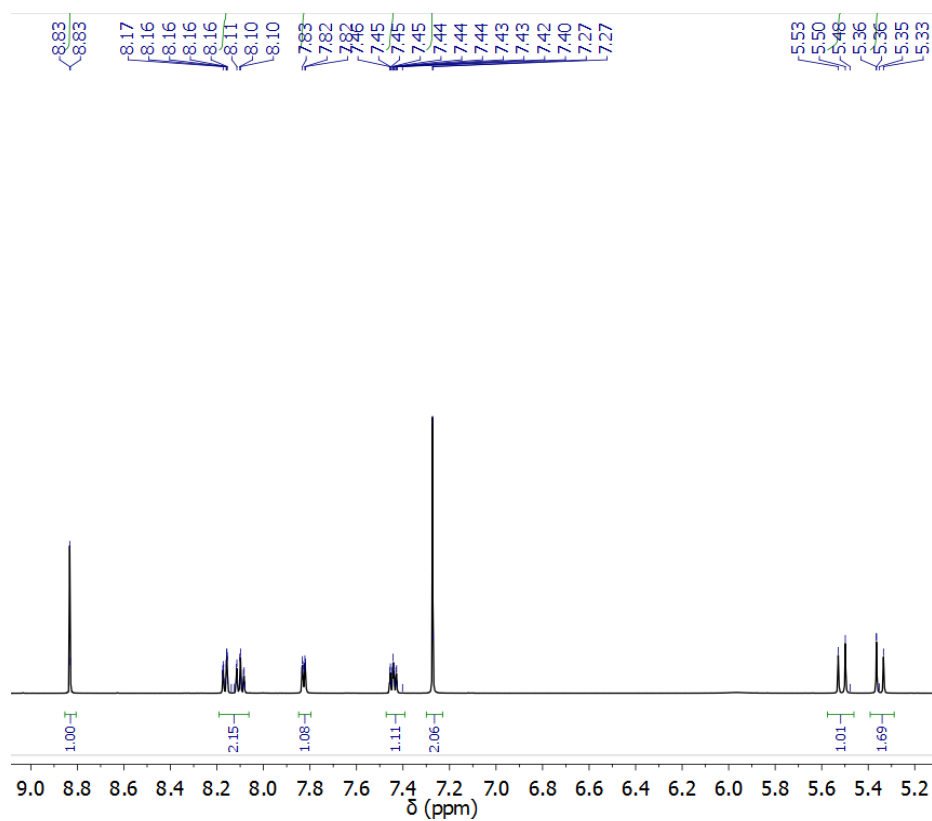**Figure S8.** Partial  $^1\text{H}$ -NMR (500 MHz,  $\text{CD}_3\text{CN}$ , 298 K) of a) the ligand **3a** and b) the Fe(II) cylinder **6a**.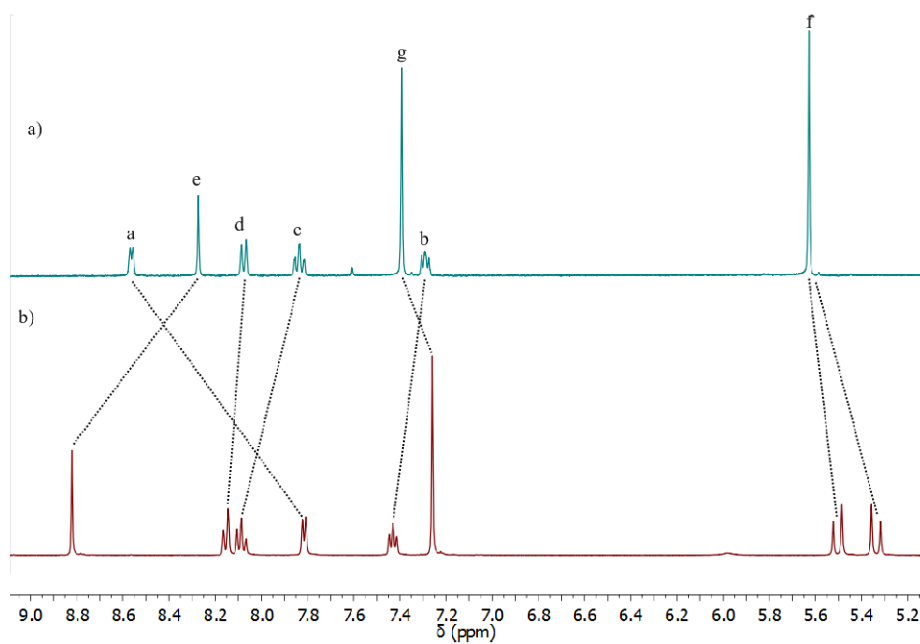

**Figure S9.** Partial  $^{13}\text{C}$ -NMR (125 MHz,  $\text{CD}_3\text{CN}$ , 298 K) of **6a**.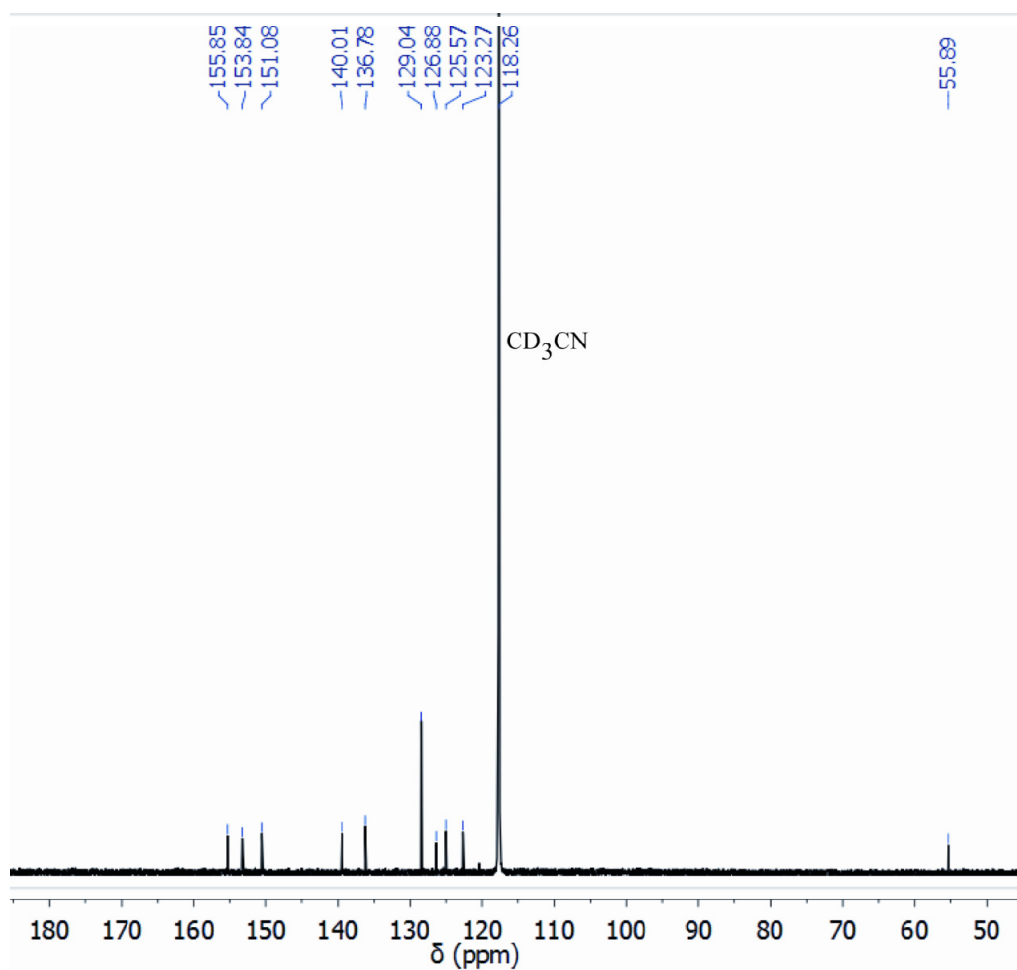**Figure S10.** Partial  $^1\text{H}$ -NMR (500 MHz,  $\text{CD}_3\text{CN}$ , 298 K) of **6b**.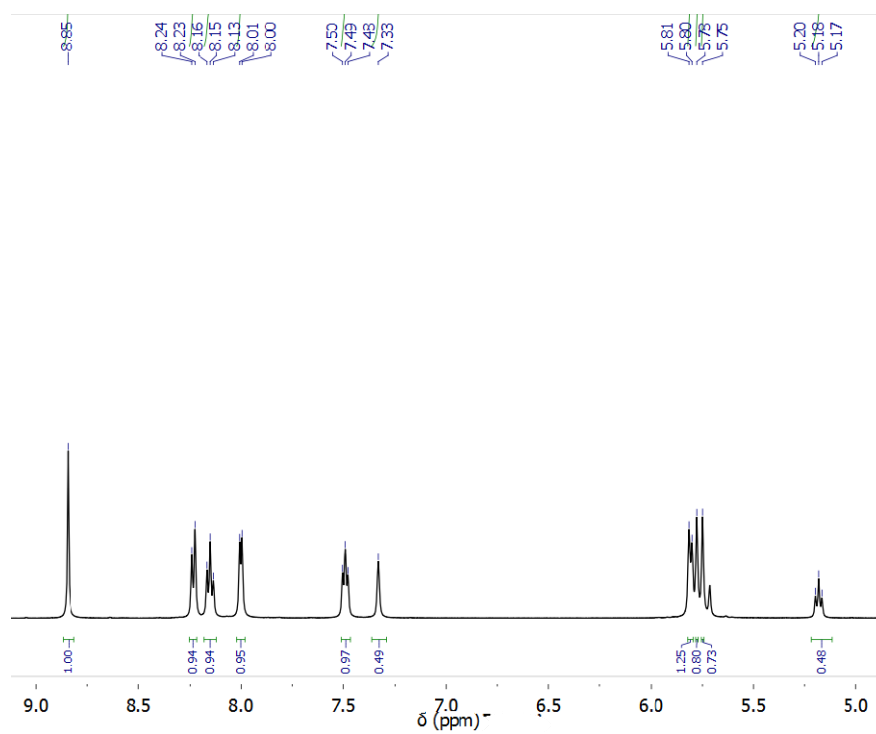

**Figure S11.** Partial  $^1\text{H}$ -NMR (500 MHz,  $\text{CD}_3\text{CN}$ , 298 K) of a) the ligand **3b** and b) the Fe(II) cylinder **6b**.

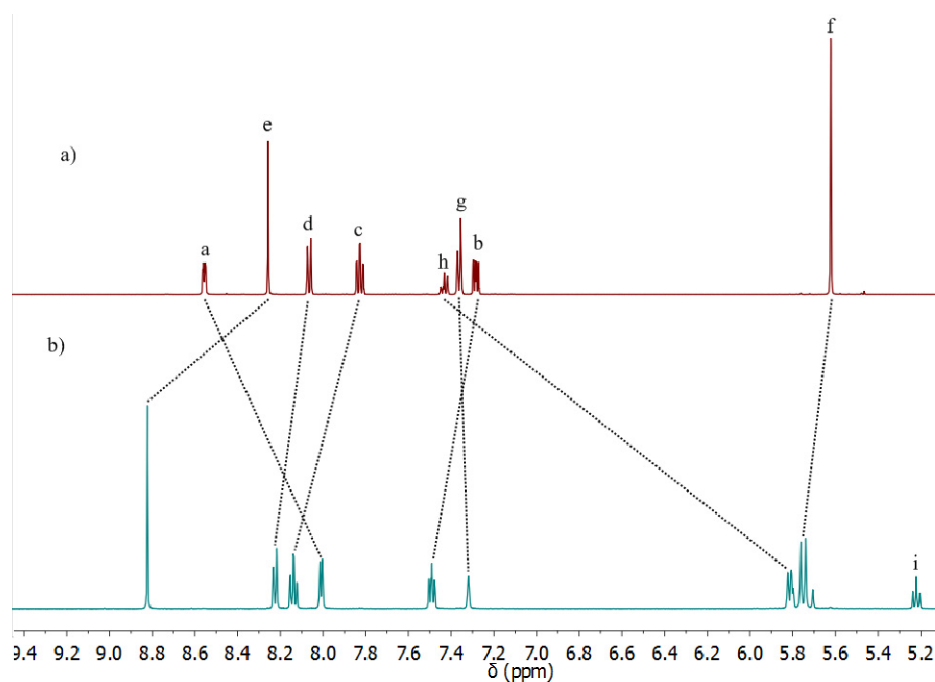

**Figure S12.** Partial  $^{13}\text{C}$ -NMR (125 MHz,  $\text{CD}_3\text{CN}$ , 298 K) of **6b**.

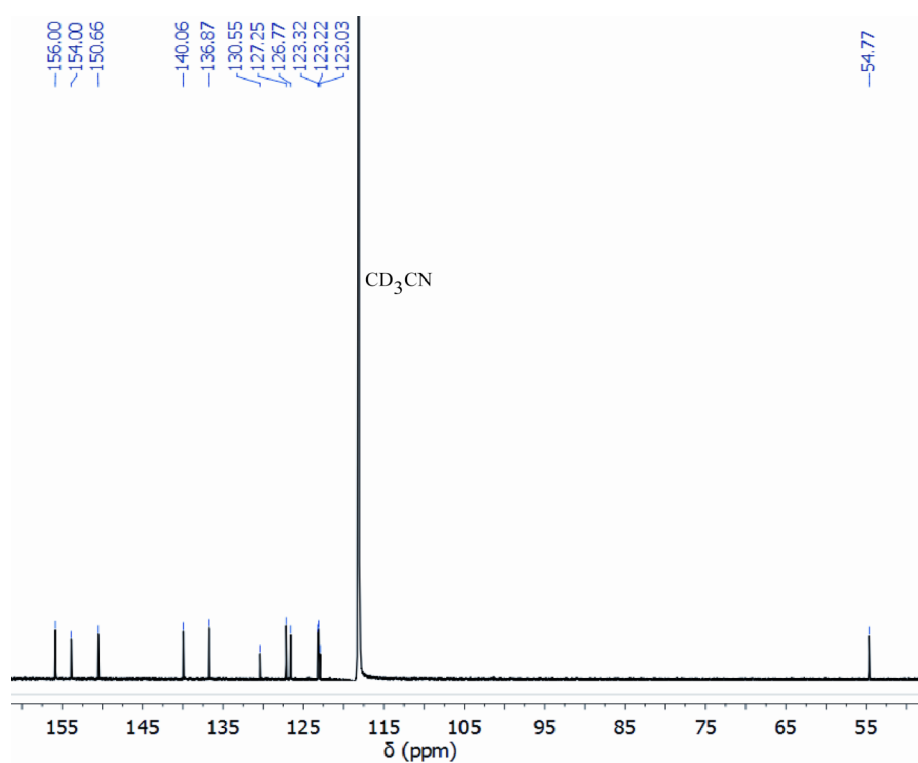



**Figure S13.** Partial  $^1\text{H}$ -NMR (500 MHz,  $\text{CD}_3\text{CN}$ , 298 K) of **6c**.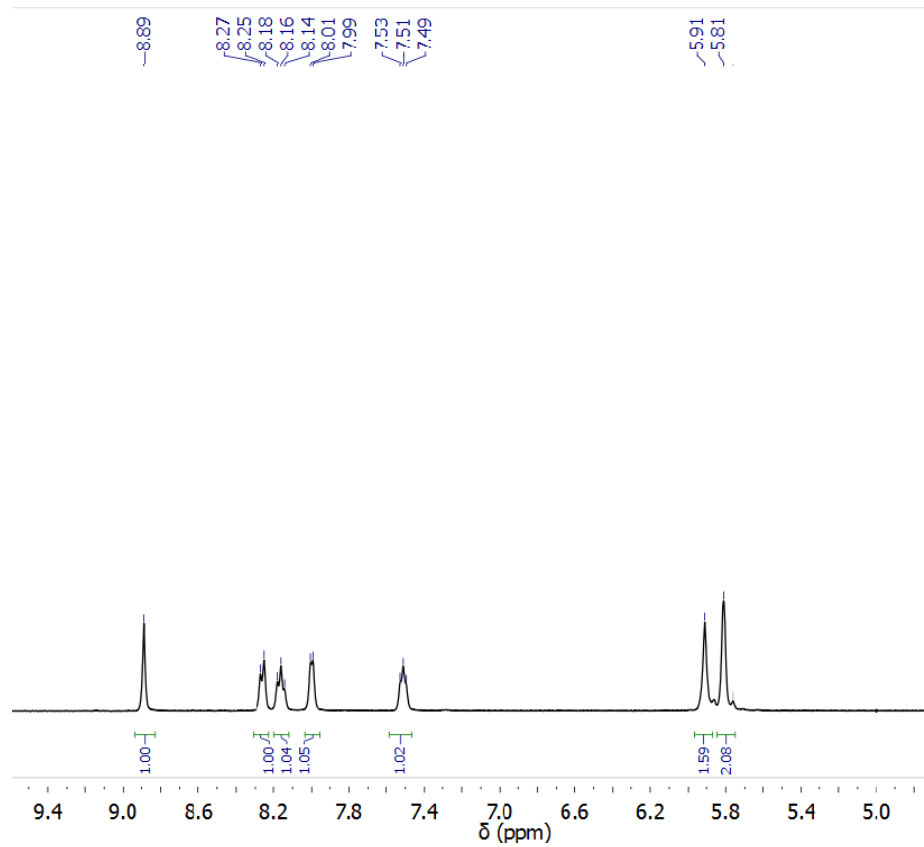**Figure S14.** Partial  $^1\text{H}$ -NMR (500 MHz,  $\text{CD}_3\text{CN}$ , 298 K) of a) the ligand **3c** and b) the Fe(II) cylinder **6c**.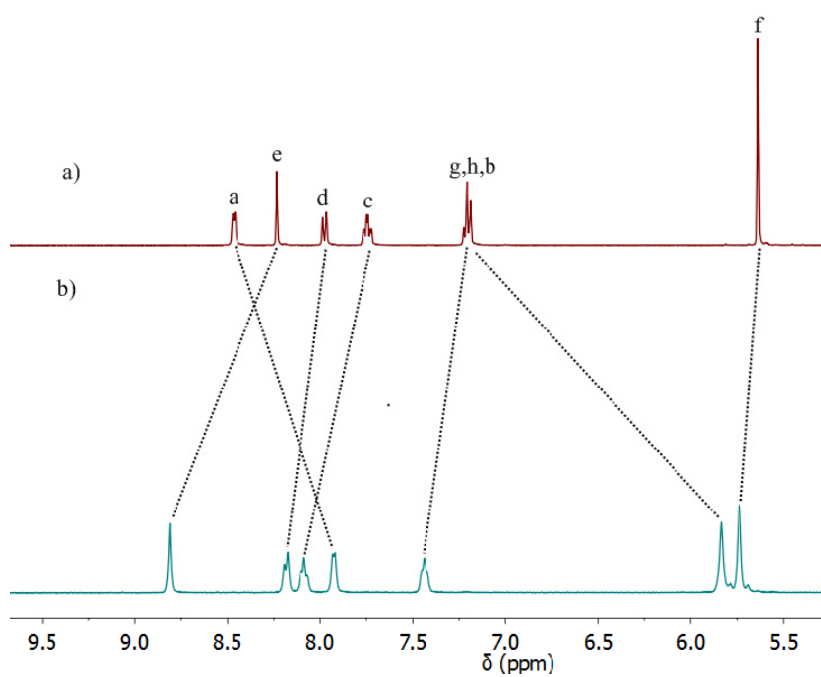

**Figure S15.** Partial  $^{13}\text{C}$ -NMR (125 MHz,  $\text{CD}_3\text{CN}$ , 298 K) of **6c**.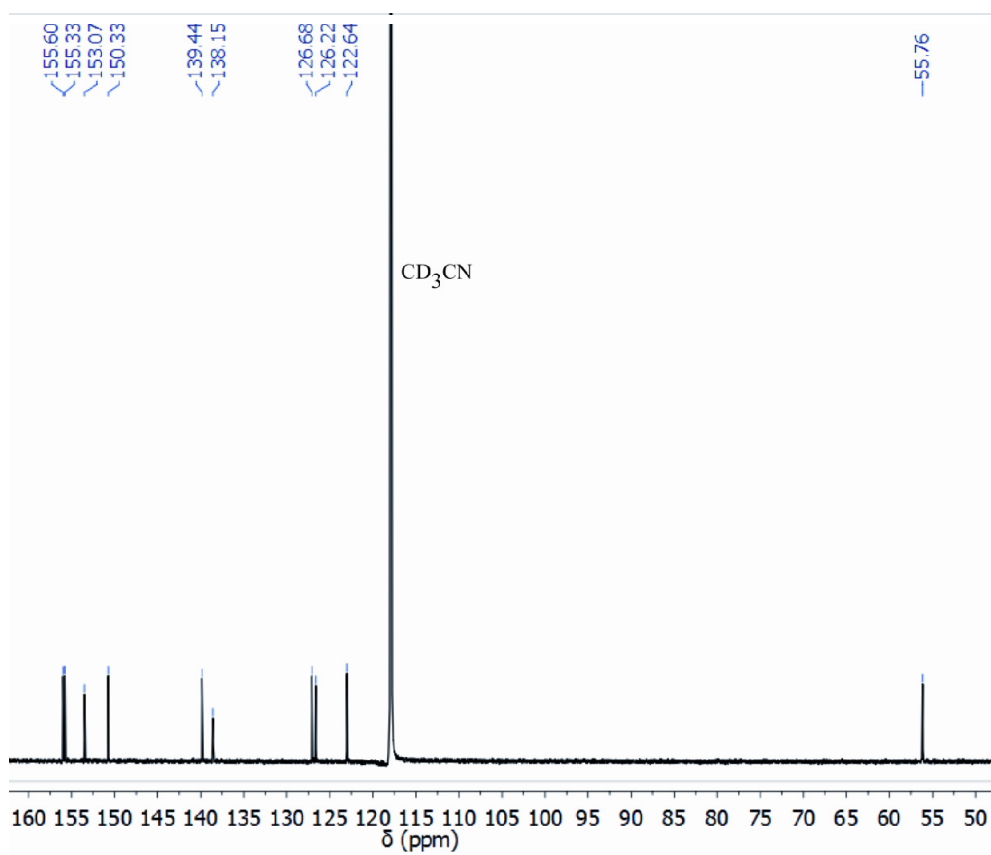**Figure S16.** Partial  $^1\text{H}$ -NMR (500 MHz,  $\text{CD}_3\text{CN}$ , 298 K) of **6d**.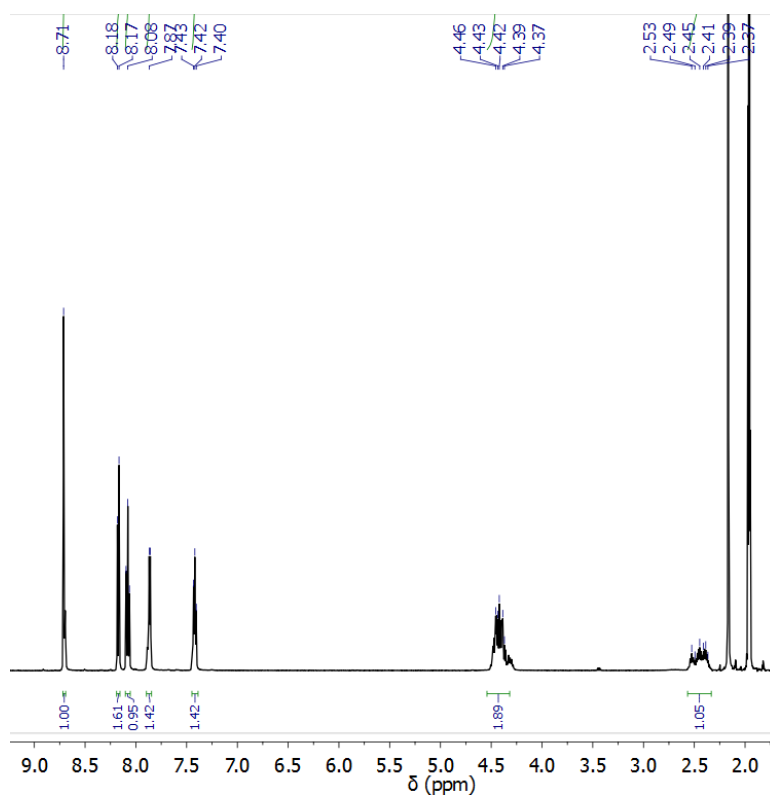

**Figure S17.** Partial  $^1\text{H}$ -NMR (500 MHz,  $\text{CD}_3\text{CN}$ , 298 K) of a) the ligand **3d** and b) the Fe(II) cylinder **6d**.

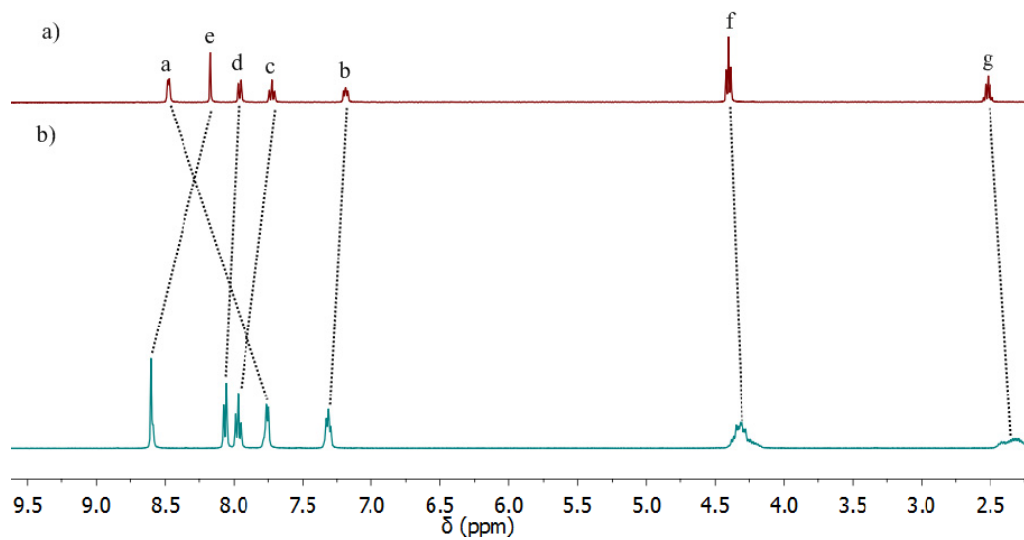

**Figure S18.** Partial  $^1\text{H}$ -NMR (500 MHz,  $\text{CD}_3\text{CN}$ , 298 K) of **6e**.

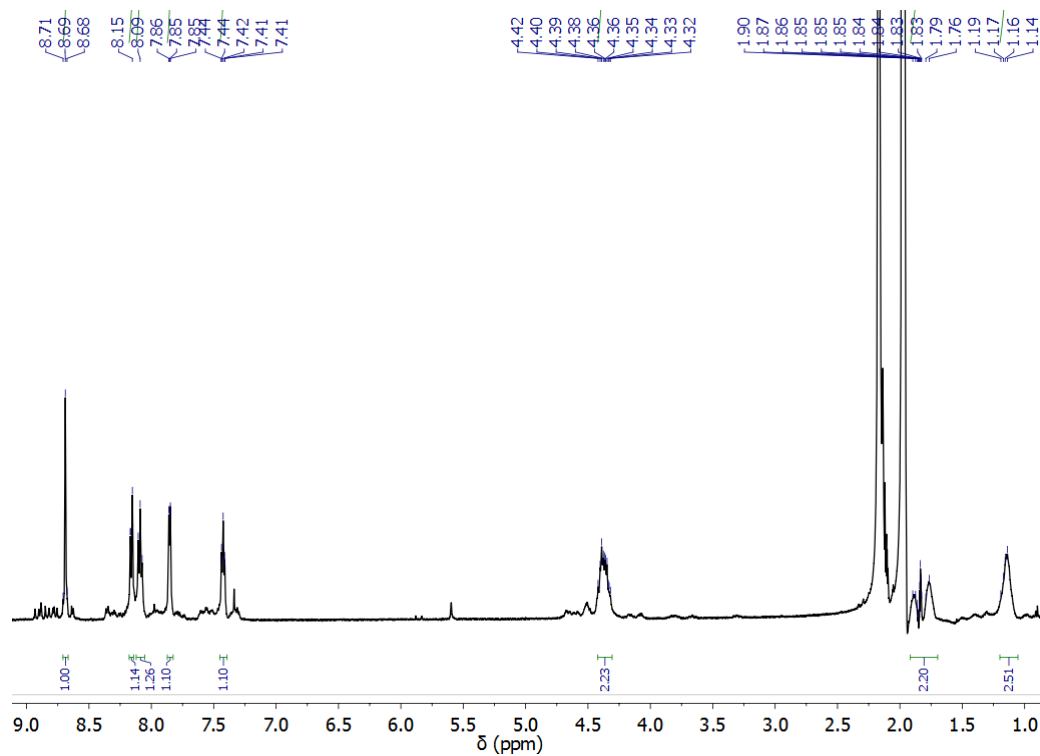

**Figure S19.** Partial  $^1\text{H}$ -NMR (500 MHz,  $\text{CD}_3\text{CN}$ , 298 K) of a) the ligand **3e** and b) the Fe(II) cylinder **6e**.

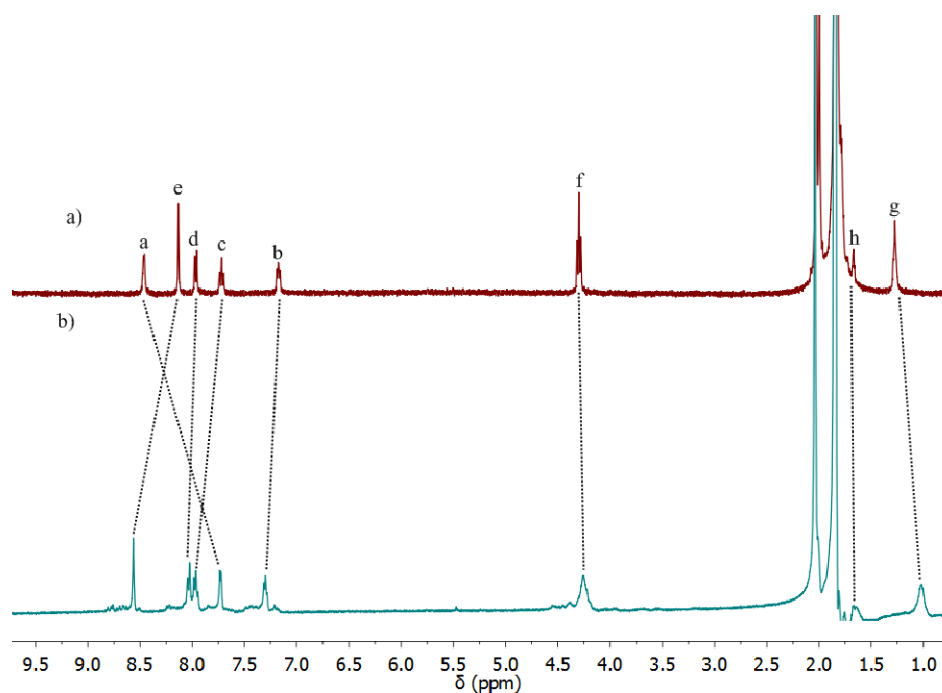

**Figure S20.** Partial  $^1\text{H}$ -NMR (500 MHz,  $\text{CD}_3\text{CN}$ , 298 K) of **6f**.

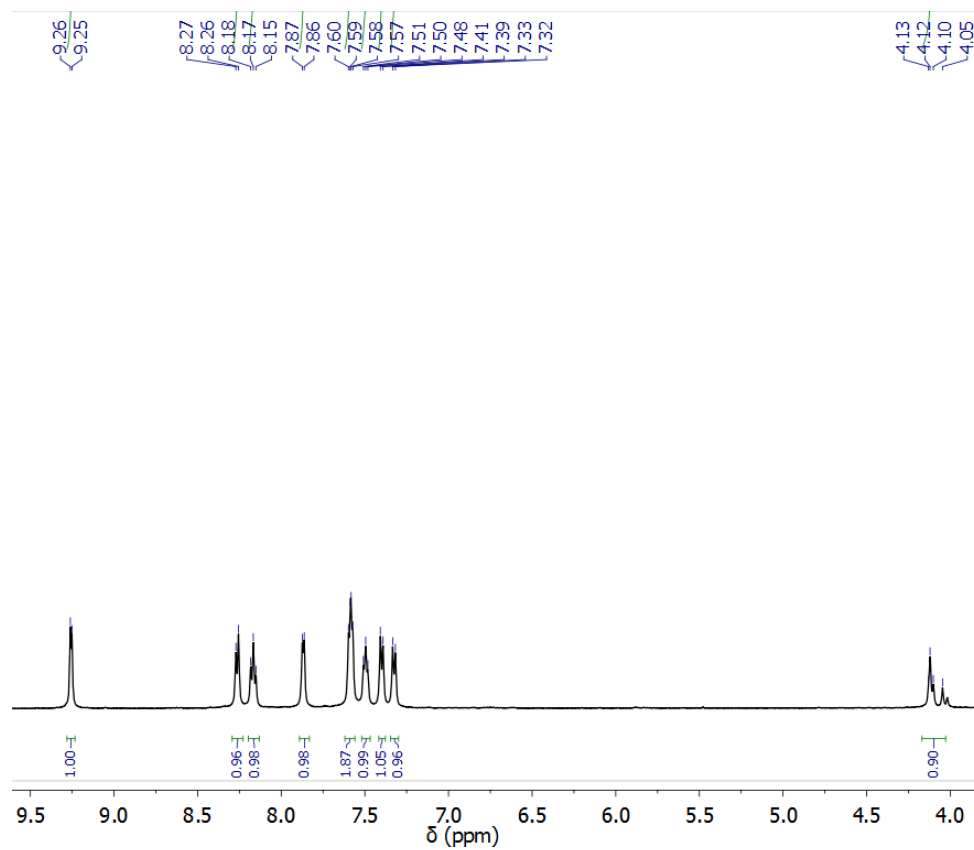

**Figure S21.** Partial  $^1\text{H}$ -NMR (500 MHz,  $\text{CD}_3\text{CN}$ , 298 K) of a) the ligand **3f** and b) the mixture *meso*- and *rac*-Fe(II) cylinder **6f**.

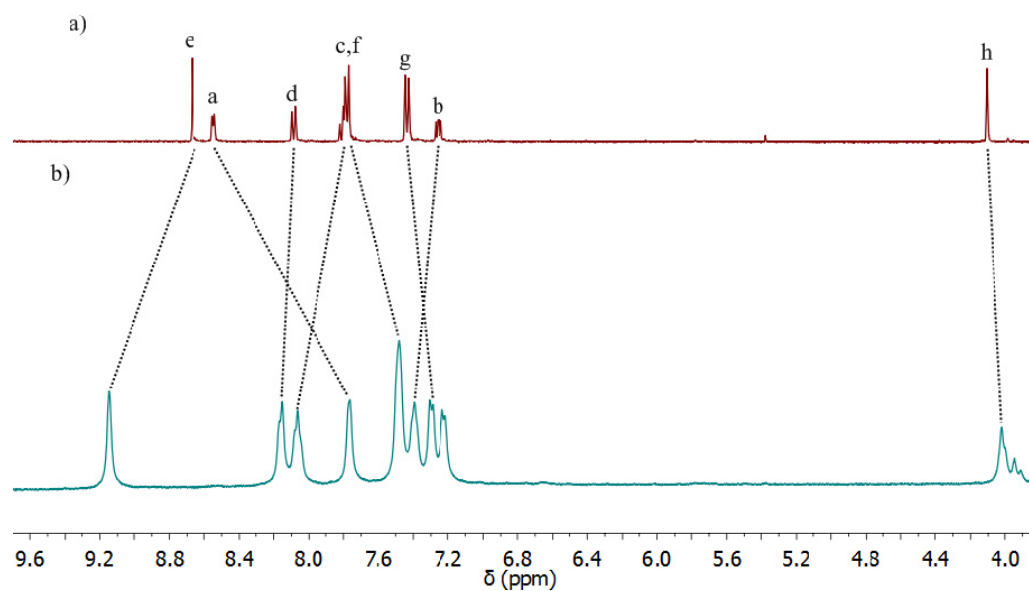

**Figure S22.** Partial  $^{13}\text{C}$ -NMR (125 MHz,  $\text{CD}_3\text{CN}$ , 298 K) of **6f**.

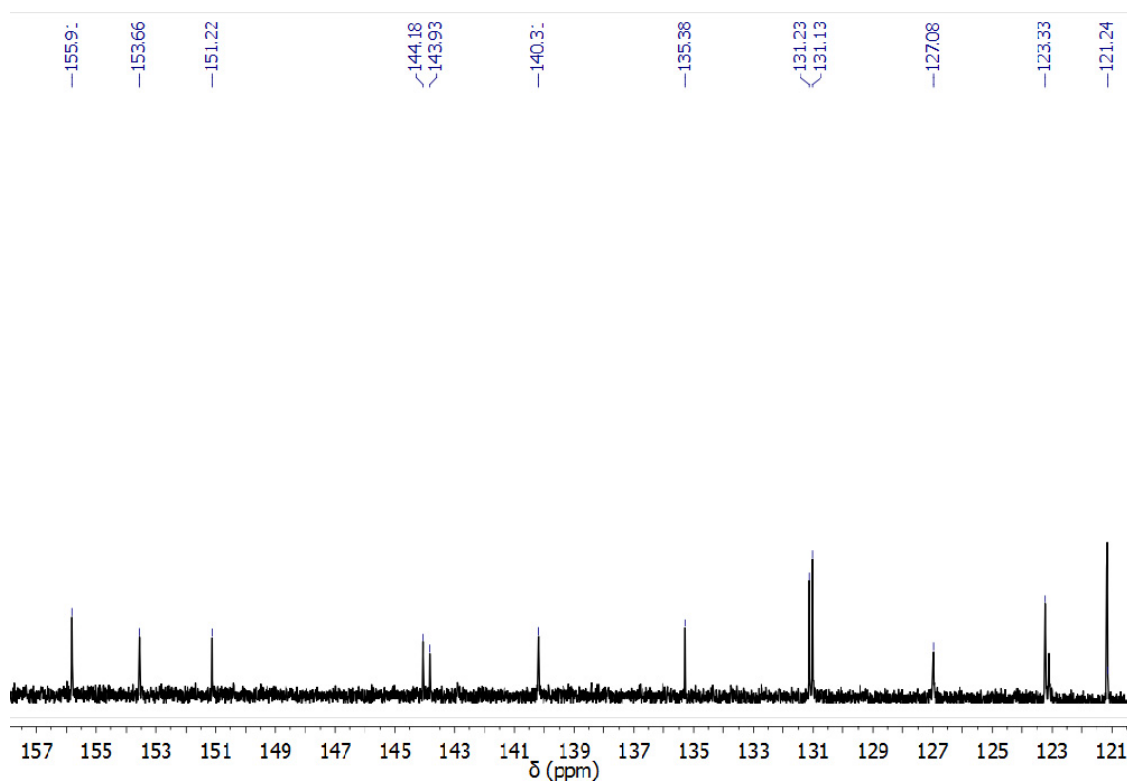

**Figure S23.** Partial  $^1\text{H}$ -NMR (500 MHz,  $\text{CD}_3\text{CN}$ , 298 K) of **8**.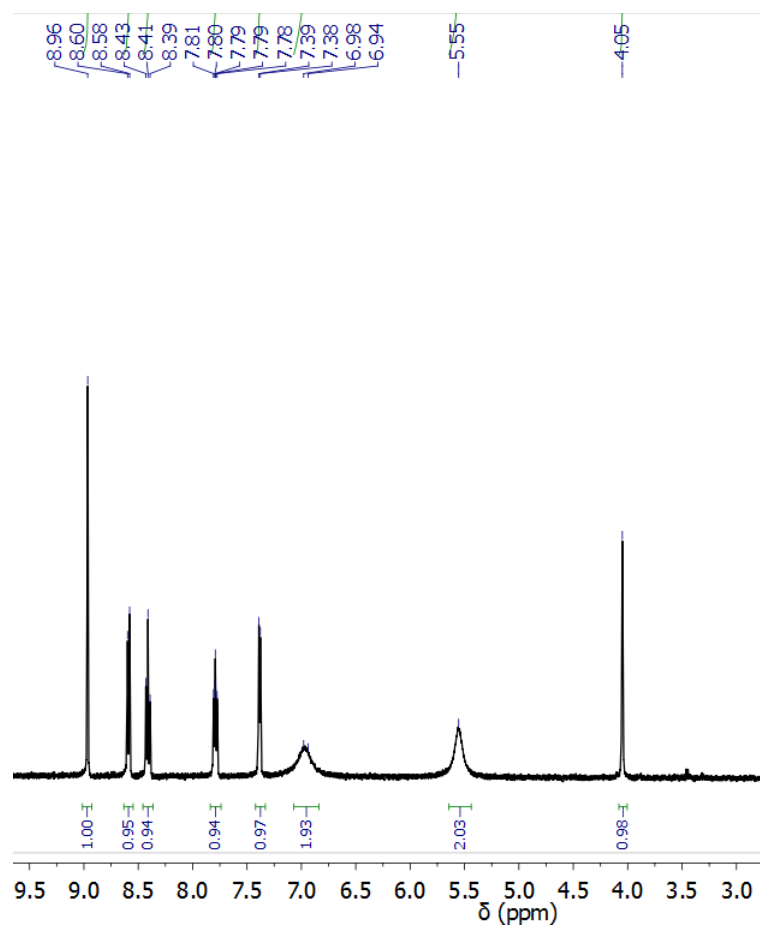**Figure S24.** Partial  $^1\text{H}$ -NMR (500 MHz,  $\text{CD}_3\text{CN}$ , 298 K) of a) the ligand **7** and b) the Fe(II) cylinder **8**.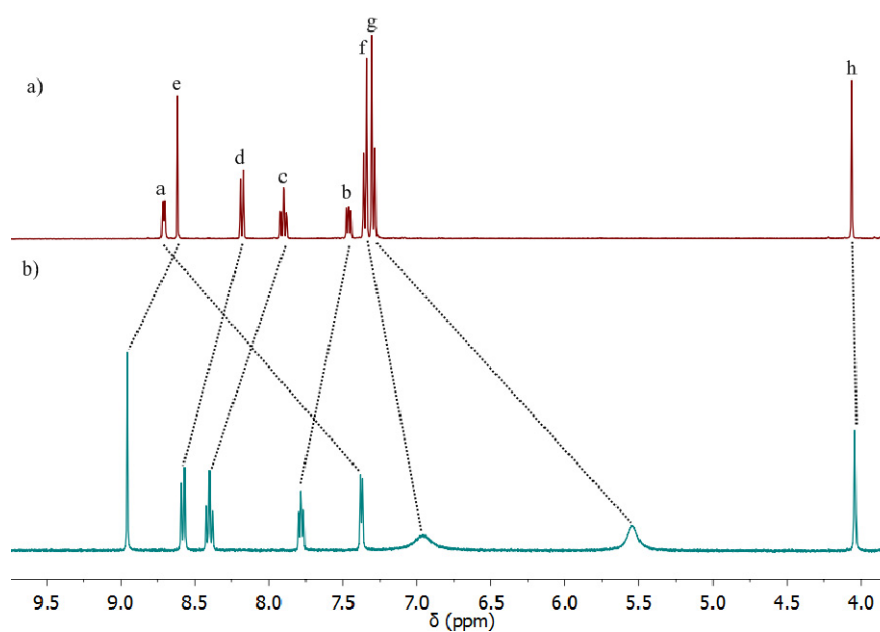

**Figure S25.** Partial  $^{13}\text{C}$ -NMR (125 MHz,  $\text{CD}_3\text{CN}$ , 298 K) of **8**.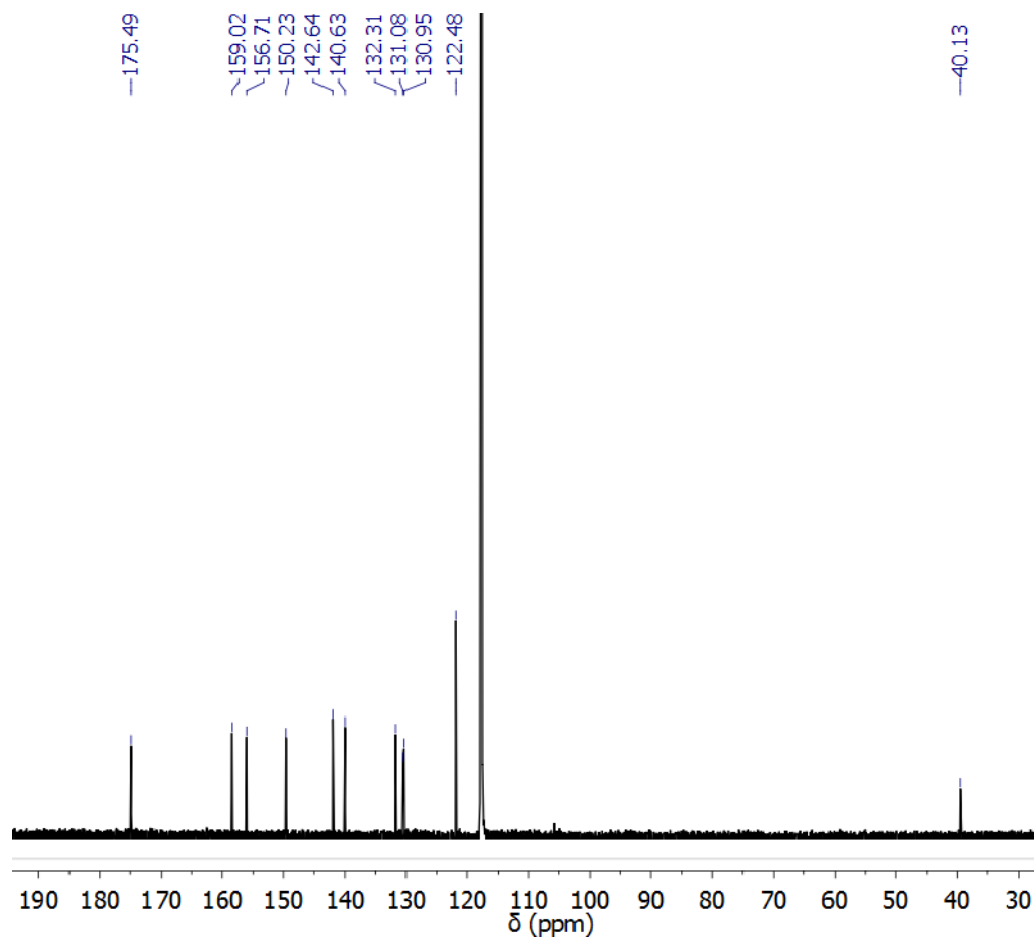

### 3. $^1\text{H}$ DOSY NMR Spectra

**Figure S26.** DOSY NMR spectra (500 MHz,  $\text{CD}_3\text{CN}$ , 298 K) recorded for the ligand **3a** (top) and the Fe(II) cylinder **6a** (bottom).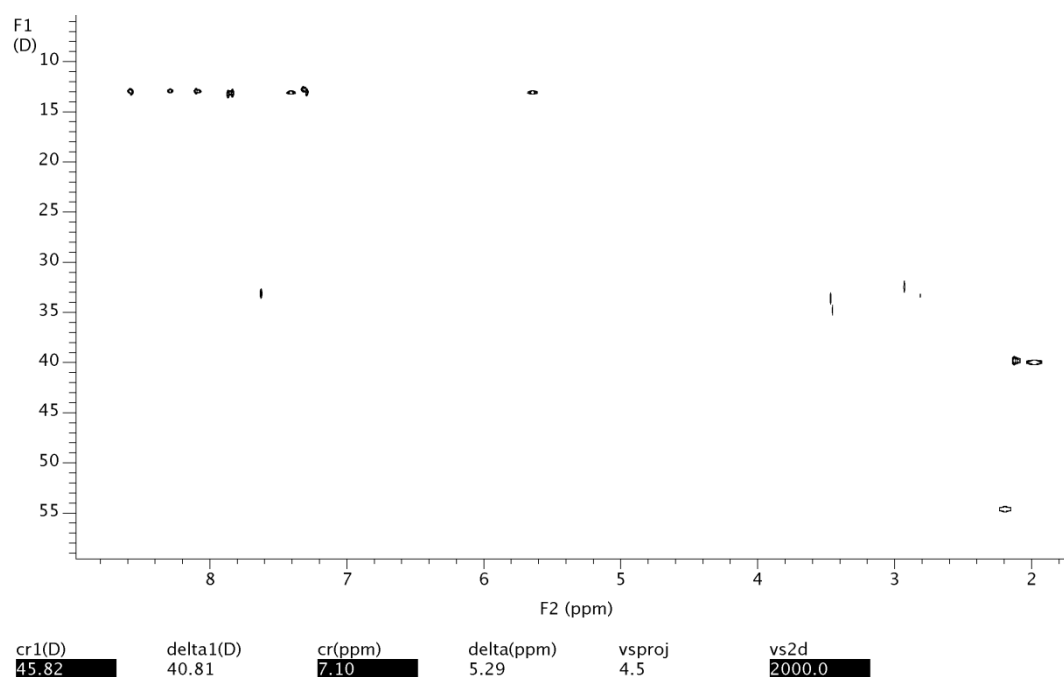

Figure S26. Cont.

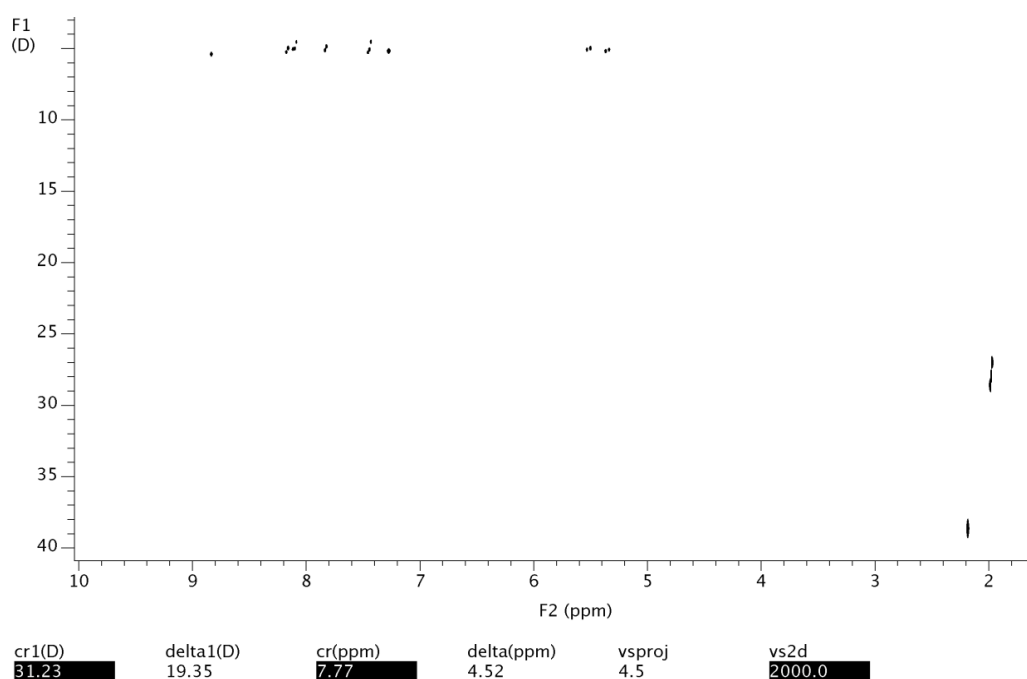

**Figure S27.** DOSY NMR spectra (500 MHz, CD<sub>3</sub>CN, 298 K) recorded for the ligand **3d** (top) and the Fe(II) cylinder **6d** (bottom).

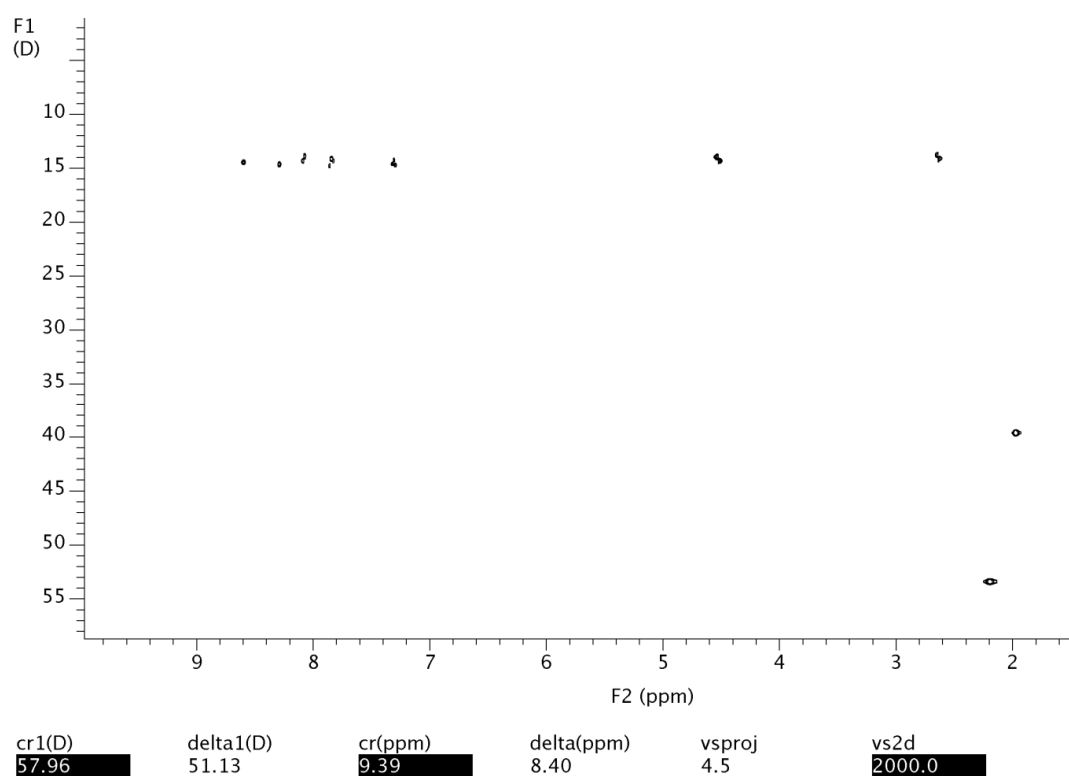



Figure S27. Cont.

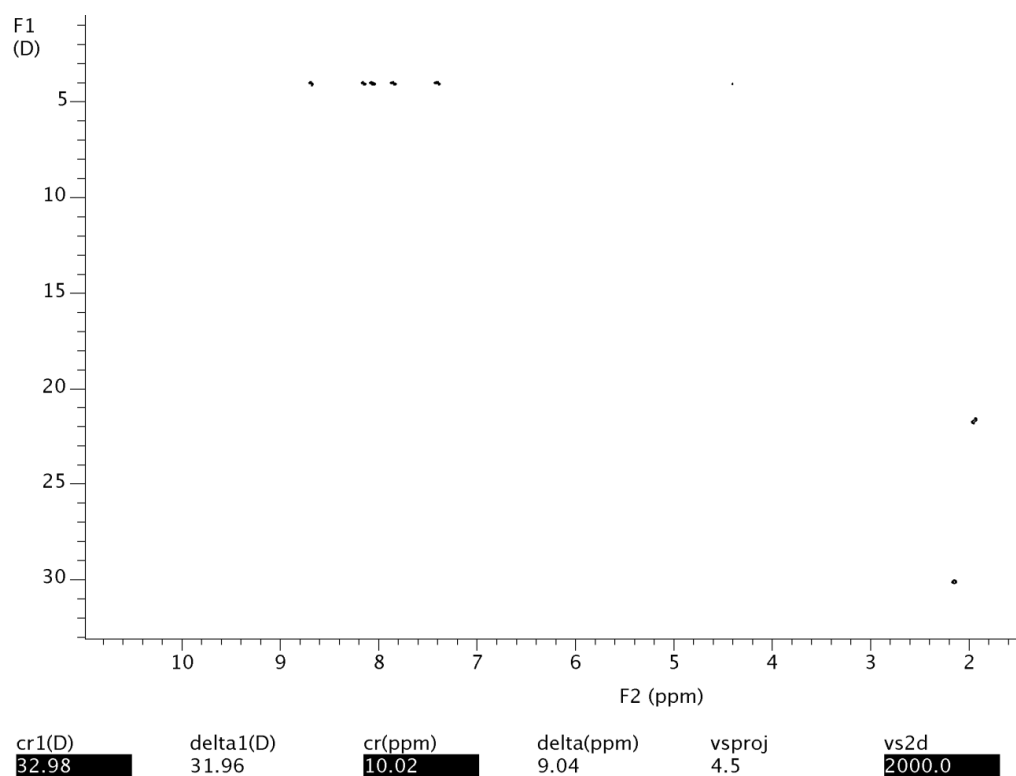

**Figure S28.** DOSY NMR spectra (500 MHz, CD<sub>3</sub>CN, 298 K) recorded for the ligand **3e** (top) and the Fe(II) cylinder **6e** (bottom).

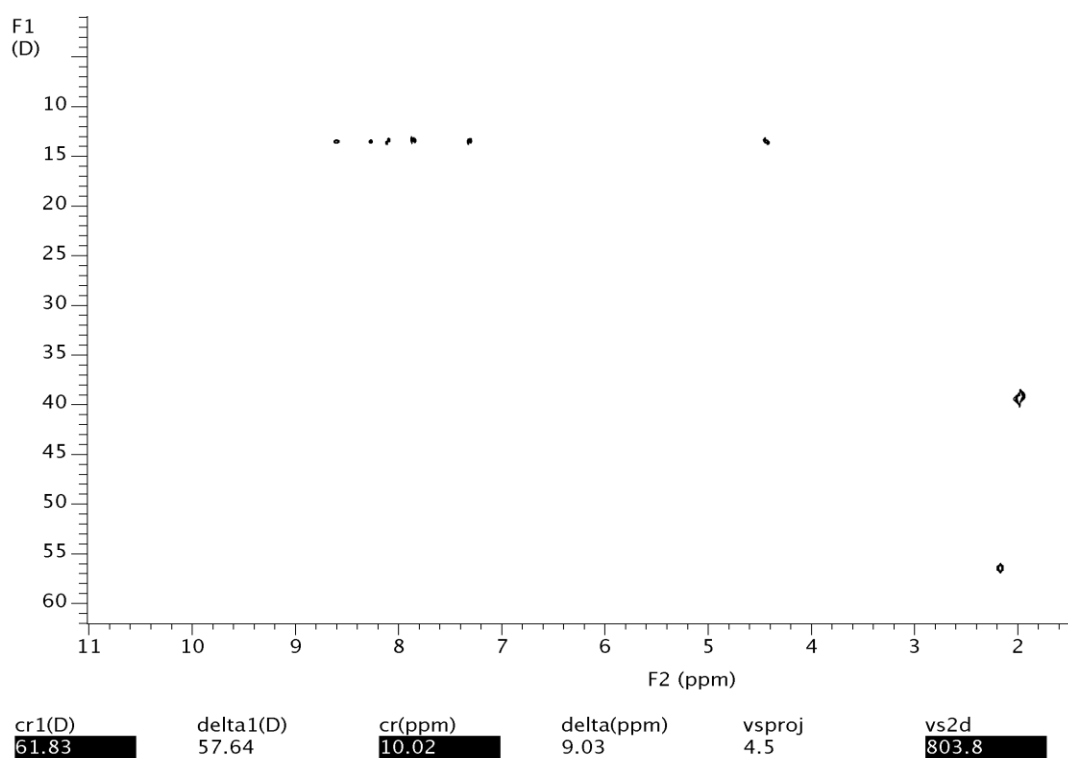



**Figure S29.** DOSY NMR spectra (500 MHz, CD<sub>3</sub>CN, 298 K) recorded for the ligand **3f** (top) and the Fe(II) cylinder **6f** (bottom).

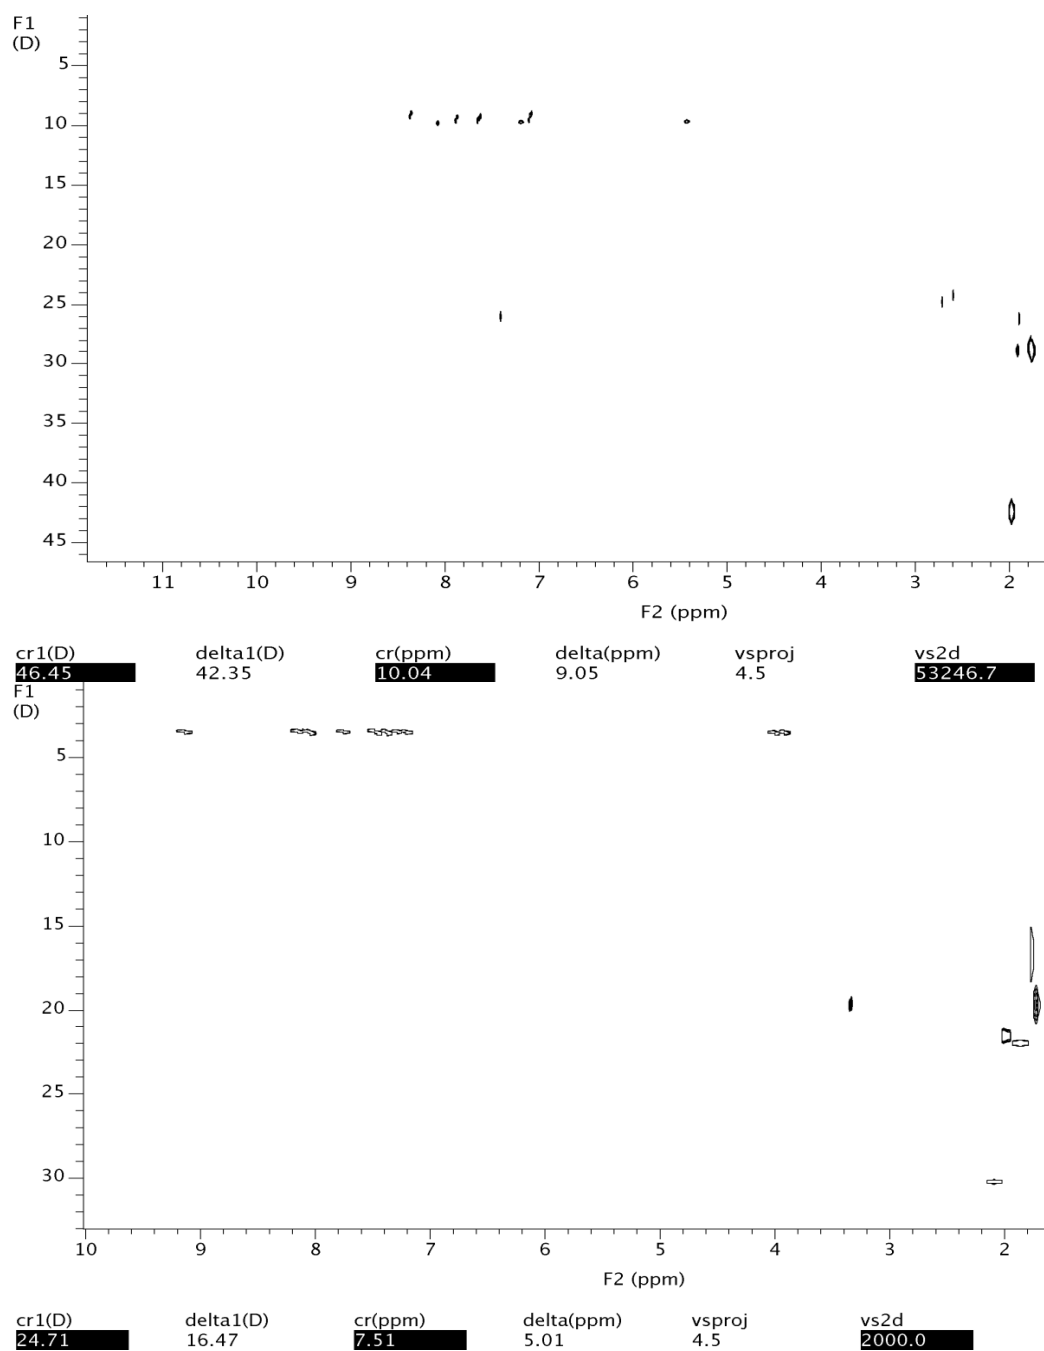

**Figure S30.** DOSY NMR spectra (500 MHz, CD<sub>3</sub>CN, 298 K) recorded for the ligand **7** (top) and the Fe(II) cylinder **8** (bottom).

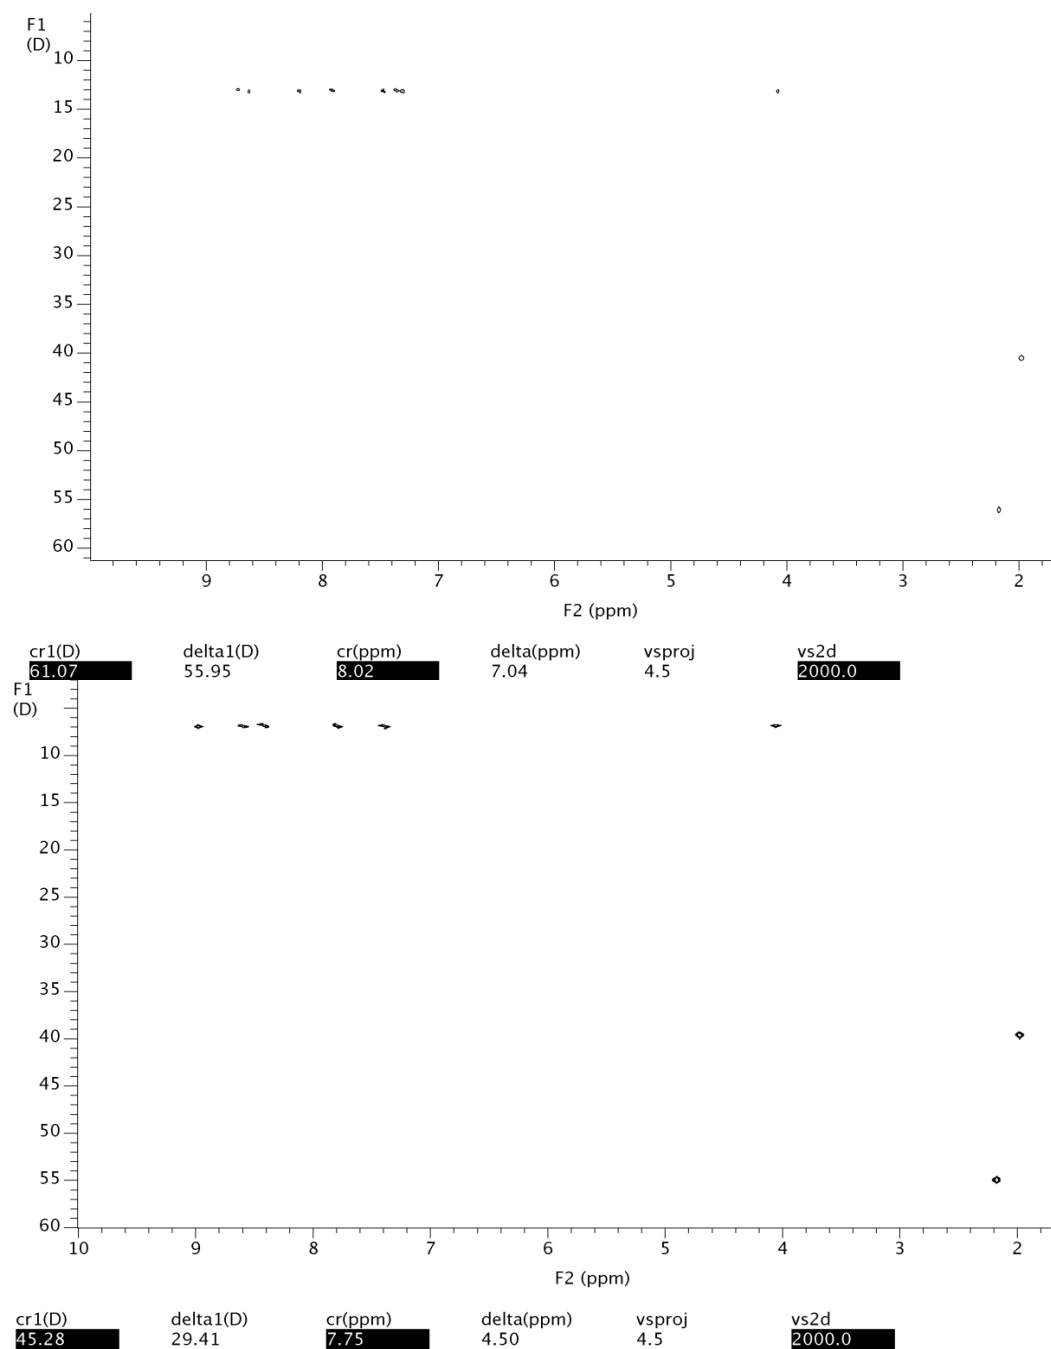

**4. X-ray Structure Views** **Figure S31.** (a) A labelled ORTEP diagram and (b) space filling representation of the cation of **6b**. The thermal ellipsoids are shown at the 50% probability level. Selected bond lengths (Å) and angles (°) for **6b**; Fe1-Fe1 12.182, Fe-N1 1.998 (3), Fe-N2 1.923(3); N1-Fe-N2 81.19 (13).

(a)

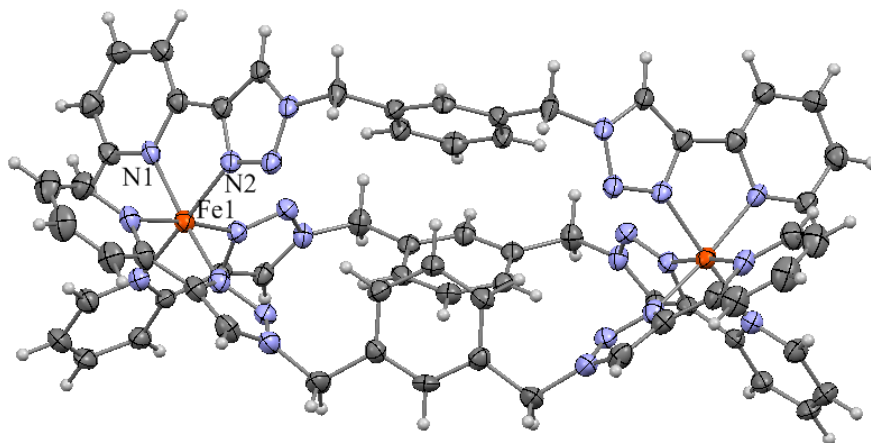

(b)

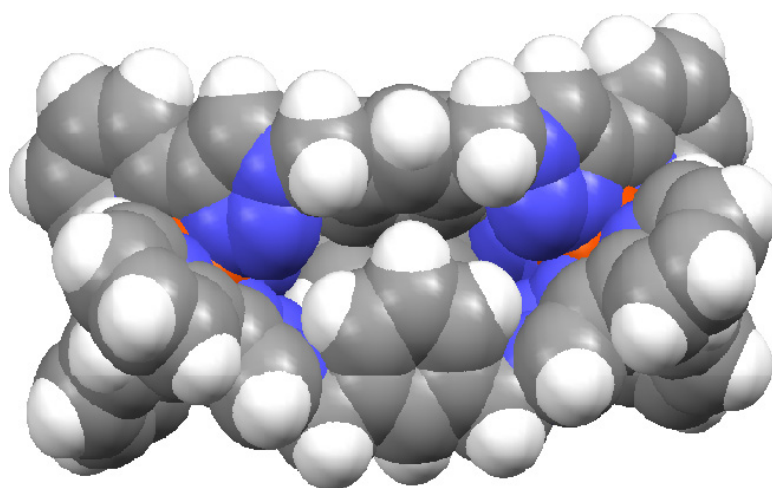

**Figure S32.** (a) A labelled ORTEP diagram and (b) space filling representation of the cation of **6c**. The thermal ellipsoids are shown at the 50% probability level. Selected bond lengths (Å) and angles (°) for **6c**; Fe1-Fe2 12.234, Fe1-N1 2.001 (4), Fe1-N2 1.944(3); N1-Fe-N2 81.05(15).

a)

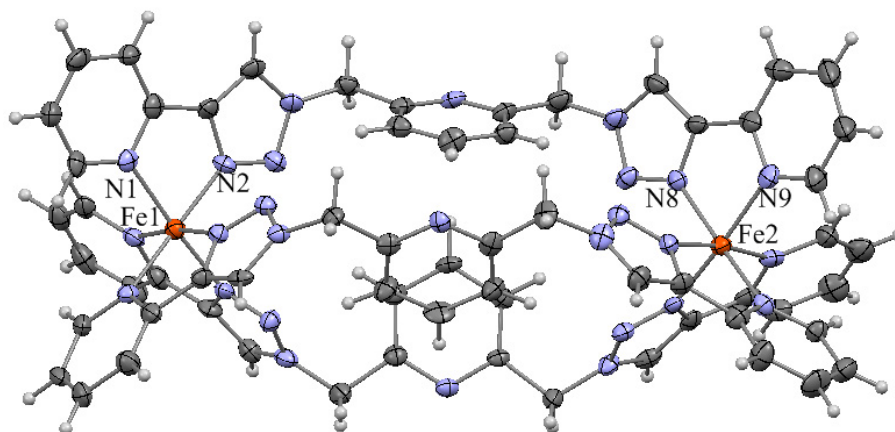

b)

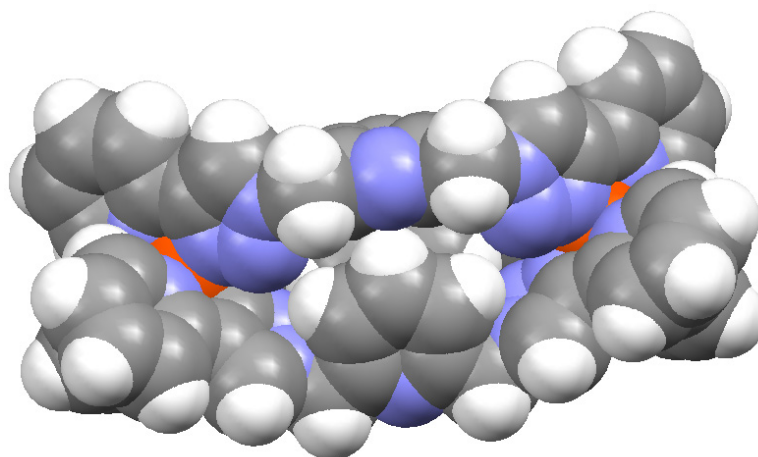

**Figure S33.** (a) A labelled ORTEP diagram and (b) space filling representation of the cation of **6f**. The thermal ellipsoids are shown at the 50% probability level. Selected bond lengths (Å) and angles (°) for **6f**; Fe1-Fe 2 14.579, Fe1-N1 1.938, Fe1-N6 2.009; N1-Fe1-N6 81.30.

a)

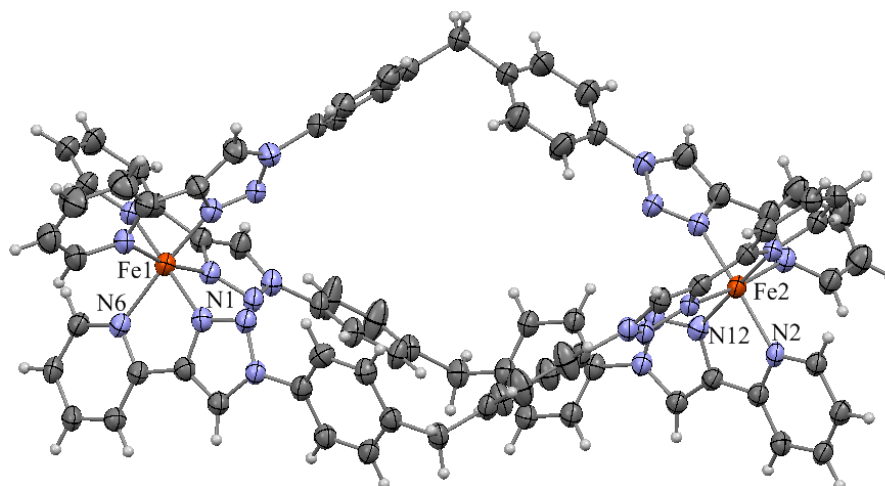

b)

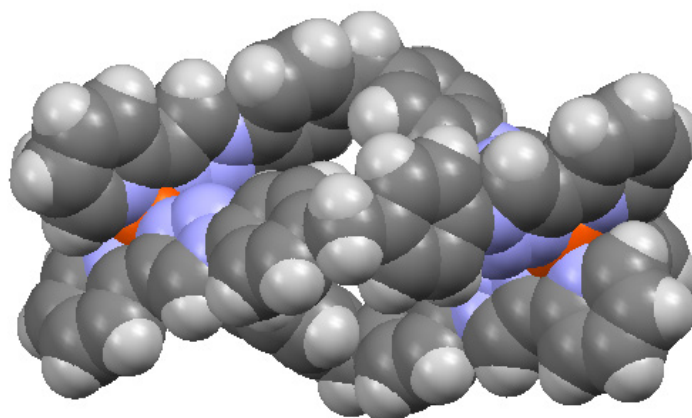

**Figure S34.** (a) A labelled ORTEP diagram and (b) space filling representation of the cation of **8**. The thermal ellipsoids are shown at the 50% probability level. Selected bond lengths (Å) and angles (°) for **8**; Fe1-Fe 2 11.246, Fe1-N1 1.994(4), Fe1-N3 2.010(4); N1-Fe-N3 80.65(15).

a)

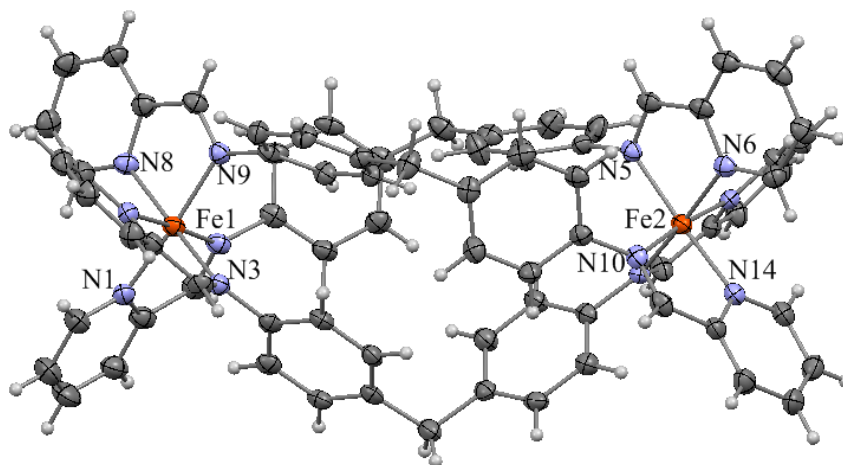

b)

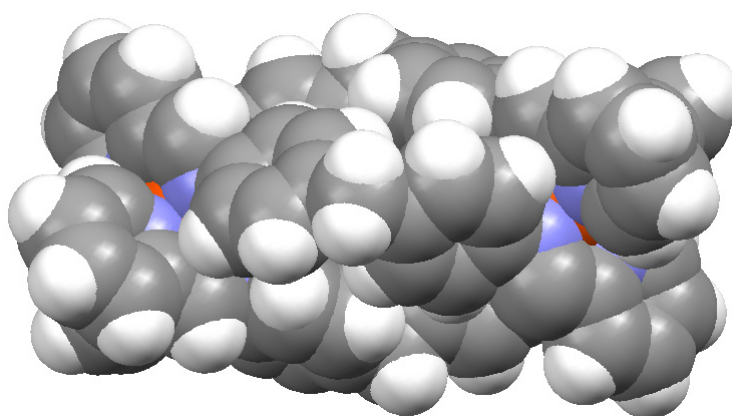



## 5. X-ray Crystal Data Tables

Table S1. X-Ray Crystal Data Table for 5a

| Identification code                                 | 5a (CCDC 931620)                                                |                        |
|-----------------------------------------------------|-----------------------------------------------------------------|------------------------|
| Empirical formula                                   | $C_{42}H_{34}B_2F_8FeN_{12}O_{0.17}$                            |                        |
| Formula weight                                      | 938.95                                                          |                        |
| Temperature                                         | 89(2) K                                                         |                        |
| Wavelength                                          | 0.71073 Å                                                       |                        |
| Crystal system                                      | Trigonal                                                        |                        |
| Space group                                         | <i>R</i> -3                                                     |                        |
| Unit cell dimensions                                | $a = 14.6715(18)$ Å                                             | $\alpha = 90^\circ$ .  |
|                                                     | $b = 14.6715(18)$ Å                                             | $\beta = 90^\circ$ .   |
|                                                     | $c = 37.495(5)$ Å                                               | $\gamma = 120^\circ$ . |
| Volume                                              | 6989.6(16) Å <sup>3</sup>                                       |                        |
| <i>Z</i>                                            | 6                                                               |                        |
| Density (calculated)                                | 1.338 Mg/m <sup>3</sup>                                         |                        |
| Absorption coefficient                              | 0.400 mm <sup>−1</sup>                                          |                        |
| <i>F</i> (000)                                      | 2876                                                            |                        |
| Crystal size                                        | 0.38 × 0.30 × 0.16 mm <sup>3</sup>                              |                        |
| Theta range for data collection                     | 2.70 to 26.39°                                                  |                        |
| Index ranges                                        | −18 ≤ <i>h</i> ≤ 18, −18 ≤ <i>k</i> ≤ 18, −46 ≤ <i>l</i> ≤ 46   |                        |
| Reflections collected                               | 59973                                                           |                        |
| Independent reflections                             | 3183 [ <i>R</i> (int) = 0.0680]                                 |                        |
| Completeness to theta = 26.39°                      | 99.7%                                                           |                        |
| Absorption correction                               | Semi-empirical from equivalents                                 |                        |
| Max. and min. transmission                          | 0.9388 and 0.8628                                               |                        |
| Refinement method                                   | Full-matrix least-squares on <i>F</i> <sup>2</sup>              |                        |
| Data/restraints/parameters                          | 3183/0/213                                                      |                        |
| Goodness-of-fit on <i>F</i> <sup>2</sup>            | 1.084                                                           |                        |
| Final <i>R</i> indices [ <i>I</i> > 2σ( <i>I</i> )] | <i>R</i> <sub>1</sub> = 0.0789, <i>wR</i> <sub>2</sub> = 0.2315 |                        |
| <i>R</i> indices (all data)                         | <i>R</i> <sub>1</sub> = 0.0881, <i>wR</i> <sub>2</sub> = 0.2382 |                        |
| Largest diff. peak and hole                         | 1.427 and −0.477 e.Å <sup>−3</sup>                              |                        |

In the case of **5a**, a H<sub>2</sub>O molecule sitting on a special position was refined isotropically and had its site occupancy fixed at 0.1111. A BF<sub>4</sub><sup>−</sup> anion had its site occupancy fixed at 0.6666 in order to balance the charge of the cation.

**Table S2.** X-Ray Crystal Data Table for **5b**.

| Identification code                | <b>5b (CCDC 931617)</b>                                      |                               |
|------------------------------------|--------------------------------------------------------------|-------------------------------|
| Empirical formula                  | $C_{39}H_{30}B_2F_8FeN_{12}$                                 |                               |
| Formula weight                     | 896.22                                                       |                               |
| Temperature                        | 89(2) K                                                      |                               |
| Wavelength                         | 0.71073 Å                                                    |                               |
| Crystal system                     | Triclinic                                                    |                               |
| Space group                        | <i>P</i> -1                                                  |                               |
| Unit cell dimensions               | $a = 8.7106(6)$ Å                                            | $\alpha = 101.395(4)^\circ$ . |
|                                    | $b = 13.1870(10)$ Å                                          | $\beta = 100.194(4)^\circ$ .  |
|                                    | $c = 22.8993(18)$ Å                                          | $\gamma = 97.669(4)^\circ$ .  |
| Volume                             | 2498.8(3) Å <sup>3</sup>                                     |                               |
| <i>Z</i>                           | 2                                                            |                               |
| Density (calculated)               | 1.191 Mg/m <sup>3</sup>                                      |                               |
| Absorption coefficient             | 0.370 mm <sup>−1</sup>                                       |                               |
| F(000)                             | 912                                                          |                               |
| Crystal size                       | 0.85 × 0.33 × 0.10 mm <sup>3</sup>                           |                               |
| Theta range for data collection    | 0.93 to 25.50°                                               |                               |
| Index ranges                       | −10 ≤ <i>h</i> ≤ 9, −15 ≤ <i>k</i> ≤ 15, −27 ≤ <i>l</i> ≤ 27 |                               |
| Reflections collected              | 37471                                                        |                               |
| Independent reflections            | 8971 [R(int) = 0.0715]                                       |                               |
| Completeness to theta = 25.50°     | 96.5%                                                        |                               |
| Absorption correction              | Semi-empirical from equivalents                              |                               |
| Max. and min. transmission         | 0.7447 and 0.5809                                            |                               |
| Refinement method                  | Full-matrix least-squares on F <sup>2</sup>                  |                               |
| Data/restraints/parameters         | 8971/0/559                                                   |                               |
| Goodness-of-fit on F <sup>2</sup>  | 1.093                                                        |                               |
| Final <i>R</i> indices [I > 2σ(I)] | $R_1 = 0.0945$ , $wR_2 = 0.2581$                             |                               |
| <i>R</i> indices (all data)        | $R_1 = 0.1083$ , $wR_2 = 0.2680$                             |                               |
| Largest diff. peak and hole        | 1.143 and −0.818 e.Å <sup>−3</sup>                           |                               |

Following the location of the atoms of **5b** in the ΔF map, there was still residual electron density present within channels through the structure. Disappointingly, this residual electron density could not be satisfactorily modeled. The SQUEEZE routine of PLATON was employed to treat the regions of diffuse solvent. The number of electrons located was 155 per unit cell and this was assigned to a molecule of CH<sub>3</sub>CH<sub>2</sub>OCH<sub>2</sub>CH<sub>3</sub> and 3/2 molecules of CH<sub>3</sub>CN per complex.

**Table S3.** X-Ray Crystal Data Table for **6b**.

| Identification code                    | <b>6b (CCDC 931619)</b>                                            |                              |
|----------------------------------------|--------------------------------------------------------------------|------------------------------|
| Empirical formula                      | $C_{68}H_{88}B_4F_{16}Fe_2N_{24}O$                                 |                              |
| Formula weight                         | 1716.56                                                            |                              |
| Temperature                            | 93(2) K                                                            |                              |
| Wavelength                             | 0.71073 Å                                                          |                              |
| Crystal system                         | Monoclinic                                                         |                              |
| Space group                            | $P2(1)/m$                                                          |                              |
| Unit cell dimensions                   | $a = 13.004(3)$ Å                                                  | $\alpha = 90^\circ$ .        |
|                                        | $b = 23.348(5)$ Å                                                  | $\beta = 92.558(12)^\circ$ . |
|                                        | $c = 14.674(3)$ Å                                                  | $\gamma = 90^\circ$ .        |
| Volume                                 | $4450.8(16)$ Å <sup>3</sup>                                        |                              |
| $Z$                                    | 2                                                                  |                              |
| Density (calculated)                   | 1.281 Mg/m <sup>3</sup>                                            |                              |
| Absorption coefficient                 | 0.412 mm <sup>-1</sup>                                             |                              |
| $F(000)$                               | 1776                                                               |                              |
| Crystal size                           | $0.54 \times 0.41 \times 0.15$ mm <sup>3</sup>                     |                              |
| Theta range for data collection        | 1.39 to 25.28°                                                     |                              |
| Index ranges                           | $-15 \leq h \leq 15$ , $-27 \leq k \leq 27$ , $-17 \leq l \leq 17$ |                              |
| Reflections collected                  | 77349                                                              |                              |
| Independent reflections                | 8030 [ $R_{\text{int}} = 0.2002$ ]                                 |                              |
| Completeness to $\theta = 25.28^\circ$ | 96.9%                                                              |                              |
| Absorption correction                  | Semi-empirical from equivalents                                    |                              |
| Max. and min. transmission             | 0.9408 and 0.8081                                                  |                              |
| Refinement method                      | Full-matrix least-squares on $F^2$                                 |                              |
| Data/restraints/parameters             | 8030/0/533                                                         |                              |
| Goodness-of-fit on $F^2$               | 0.852                                                              |                              |
| Final $R$ indices [ $I > 2\sigma(I)$ ] | $R_1 = 0.0738$ , $wR_2 = 0.2132$                                   |                              |
| $R$ indices (all data)                 | $R_1 = 0.1023$ , $wR_2 = 0.2336$                                   |                              |
| Largest diff. peak and hole            | 1.276 and $-1.218$ e.Å <sup>-3</sup>                               |                              |

Similar issues, to those observed for **5b**, were encountered in the case of **6b**. The SQUEEZE routine of PLATON was applied and this located 467 electrons per unit cell. These were assigned to 10 CH<sub>3</sub>CN molecules per complex.

**Table S4.** X-Ray Crystal Data Table for 6c.

| Identification code               | 6c (CCDC 931618)                                            |                                                                               |
|-----------------------------------|-------------------------------------------------------------|-------------------------------------------------------------------------------|
| Empirical formula                 | $C_{63}H_{51}Fe_2N_{27}$                                    |                                                                               |
| Formula weight                    | 1298.01                                                     |                                                                               |
| Temperature                       | 89(2) K                                                     |                                                                               |
| Wavelength                        | 0.71073 Å                                                   |                                                                               |
| Crystal system                    | Monoclinic                                                  |                                                                               |
| Space group                       | $C2/c$                                                      |                                                                               |
| Unit cell dimensions              | $a = 41.770(4)$ Å<br>$b = 20.297(2)$ Å<br>$c = 18.751(2)$ Å | $\alpha = 90^\circ$ .<br>$\beta = 95.264(4)^\circ$ .<br>$\gamma = 90^\circ$ . |
| Volume                            | 15830(3) Å <sup>3</sup>                                     |                                                                               |
| Z                                 | 8                                                           |                                                                               |
| Density (calculated)              | 1.089 Mg/m <sup>3</sup>                                     |                                                                               |
| Absorption coefficient            | 0.418 mm <sup>-1</sup>                                      |                                                                               |
| F(000)                            | 6672                                                        |                                                                               |
| Crystal size                      | 0.23 × 0.19 × 0.12 mm <sup>3</sup>                          |                                                                               |
| Theta range for data collection   | 0.98 to 24.85°                                              |                                                                               |
| Index ranges                      | −49 ≤ h ≤ 42, −22 ≤ k ≤ 20, −15 ≤ l ≤ 22                    |                                                                               |
| Reflections collected             | 22939                                                       |                                                                               |
| Independent reflections           | 9733 [R(int) = 0.0410]                                      |                                                                               |
| Completeness to theta = 24.85°    | 71.1%                                                       |                                                                               |
| Absorption correction             | Semi-empirical from equivalents                             |                                                                               |
| Max. and min. transmission        | 0.9729 and 0.6874                                           |                                                                               |
| Refinement method                 | Full-matrix least-squares on F <sup>2</sup>                 |                                                                               |
| Data/restraints/parameters        | 9733/48/829                                                 |                                                                               |
| Goodness-of-fit on F <sup>2</sup> | 1.056                                                       |                                                                               |
| Final R indices [I > 2σ(I)]       | $R_1 = 0.0610$ , $wR_2 = 0.1721$                            |                                                                               |
| R indices (all data)              | $R_1 = 0.0805$ , $wR_2 = 0.1841$                            |                                                                               |
| Largest diff. peak and hole       | 0.748 and −0.346 e.Å <sup>-3</sup>                          |                                                                               |

The crystals of **6c** were small and weakly diffracting resulting in low completeness (71%). A SIMU restraint was applied to various atoms in the ligand namely C1,C2; C9,C10,C8, N5; C16,C17,C15; N4,C8,N5,C7. Additionally, the SQUEEZE procedure was employed to treat regions of diffuse solvent which could not be sensibly modelled, 2003 electrons per unit cell were located and this was assigned to 4 BF<sub>4</sub> and 4 CH<sub>3</sub>CN molecules per complex.

Table S5. X-Ray Crystal Data Table for 6f.

| Identification code                    | 6f (CCDC 931616)                                                   |                           |
|----------------------------------------|--------------------------------------------------------------------|---------------------------|
| Empirical formula                      | $C_{45.50}H_{37.50}B_2F_8FeN_{14.50}$                              |                           |
| Formula weight                         | 1016.87                                                            |                           |
| Temperature                            | 100(2) K                                                           |                           |
| Wavelength                             | 0.71080 Å                                                          |                           |
| Crystal system                         | Triclinic                                                          |                           |
| Space group                            | $P\bar{1}$                                                         |                           |
| Unit cell dimensions                   | $a = 15.815(3)$ Å                                                  | $\alpha = 93.71(3)^\circ$ |
|                                        | $b = 16.813(3)$ Å                                                  | $\beta = 100.45(3)^\circ$ |
|                                        | $c = 18.505(4)$ Å                                                  | $\gamma = 93.53(3)^\circ$ |
| Volume                                 | $4815.1(17)$ Å <sup>3</sup>                                        |                           |
| $Z$                                    | 4                                                                  |                           |
| Density (calculated)                   | $1.403$ Mg/m <sup>3</sup>                                          |                           |
| Absorption coefficient                 | $0.394$ mm <sup>−1</sup>                                           |                           |
| $F(000)$                               | 2080                                                               |                           |
| Crystal size                           | $0.1 \times 0.1 \times 0.1$ mm <sup>3</sup>                        |                           |
| Theta range for data collection        | 1.31 to $26.00^\circ$                                              |                           |
| Index ranges                           | $-18 \leq h \leq 18$ , $-20 \leq k \leq 20$ , $-22 \leq l \leq 22$ |                           |
| Reflections collected                  | 63141                                                              |                           |
| Independent reflections                | 17236 [ $R_{\text{int}} = 0.0489$ ]                                |                           |
| Completeness to $\theta = 26.00^\circ$ | 91.0%                                                              |                           |
| Absorption correction                  | None                                                               |                           |
| Refinement method                      | Full-matrix least-squares on $F^2$                                 |                           |
| Data/restraints/parameters             | 17236/18/1284                                                      |                           |
| Goodness-of-fit on $F^2$               | 1.070                                                              |                           |
| Final $R$ indices [ $I > 2\sigma(I)$ ] | $R_1 = 0.0930$ , $wR_2 = 0.2782$                                   |                           |
| $R$ indices (all data)                 | $R_1 = 0.1071$ , $wR_2 = 0.2884$                                   |                           |
| Largest diff. peak and hole            | 1.092 and $-0.661$ e.Å <sup>−3</sup>                               |                           |

In case of structure **6f** CH<sub>3</sub>CN carbon atoms C10, C11 and C158 when refined anisotropically had anisotropic displacement parameters (ADPs) uniaxially elongated. An ISOR command was employed to restrain the ADPs of these atoms.

Table S6. X-Ray Crystal Data Table for 8.

| Identification code                    | 8 (CCDC 931621)                                                |                              |
|----------------------------------------|----------------------------------------------------------------|------------------------------|
| Empirical formula                      | $C_{77}H_{63}B_4F_{16}Fe_2N_{13}O_{0.54}$                      |                              |
| Formula weight                         | 1637.98                                                        |                              |
| Temperature                            | 90(2) K                                                        |                              |
| Wavelength                             | 0.71073 Å                                                      |                              |
| Crystal system                         | Monoclinic                                                     |                              |
| Space group                            | $P2(1)/n$                                                      |                              |
| Unit cell dimensions                   | $a = 22.372(5)$ Å                                              | $\alpha = 90^\circ$ .        |
|                                        | $b = 13.462(2)$ Å                                              | $\beta = 107.148(7)^\circ$ . |
|                                        | $c = 24.944(5)$ Å                                              | $\gamma = 90^\circ$ .        |
| Volume                                 | $7179(3)$ Å <sup>3</sup>                                       |                              |
| $Z$                                    | 4                                                              |                              |
| Density (calculated)                   | $1.516$ Mg/m <sup>3</sup>                                      |                              |
| Absorption coefficient                 | $0.503$ mm <sup>-1</sup>                                       |                              |
| $F(000)$                               | 3345.6                                                         |                              |
| Crystal size                           | $0.67 \times 0.30 \times 0.07$ mm <sup>3</sup>                 |                              |
| Theta range for data collection        | $1.08$ to $24.73^\circ$                                        |                              |
| Index ranges                           | $-26 \leq h \leq 25$ , $0 \leq k \leq 15$ , $0 \leq l \leq 29$ |                              |
| Reflections collected                  | 12078                                                          |                              |
| Independent reflections                | 12078 [ $R(\text{int}) = 0.0000$ ]                             |                              |
| Completeness to $\theta = 24.73^\circ$ | 98.5%                                                          |                              |
| Absorption correction                  | Semi-empirical from equivalents                                |                              |
| Max. and min. transmission             | 0.7451 and 0.6945                                              |                              |
| Refinement method                      | Full-matrix least-squares on $F^2$                             |                              |
| Data/restraints/parameters             | 12078/0/1075                                                   |                              |
| Goodness-of-fit on $F^2$               | 1.041                                                          |                              |
| Final $R$ indices [ $I > 2\sigma(I)$ ] | $R_1 = 0.0616$ , $wR_2 = 0.1424$                               |                              |
| $R$ indices (all data)                 | $R_1 = 0.1014$ , $wR_2 = 0.1699$                               |                              |
| Largest diff. peak and hole            | $1.350$ and $-0.529$ e.Å <sup>-3</sup>                         |                              |

In the structure **8** two of the BF<sub>4</sub> ions showed random disorder about a threefold axis. For the anion containing B1 the occupancy of the major component for F1, F3, F4 was 0.52 and for the anion containing B3 the occupancy of the major component for F5, F6, F8 was 0.67. A water molecule was assigned partial site occupancy of 0.54.

## 6. Overlaid X-ray Crystal Structures

**Figure S35.** Overlaid X-ray structures of Fe(II) cylinders **6b** (solid lines) and **6c** (dotted lines).

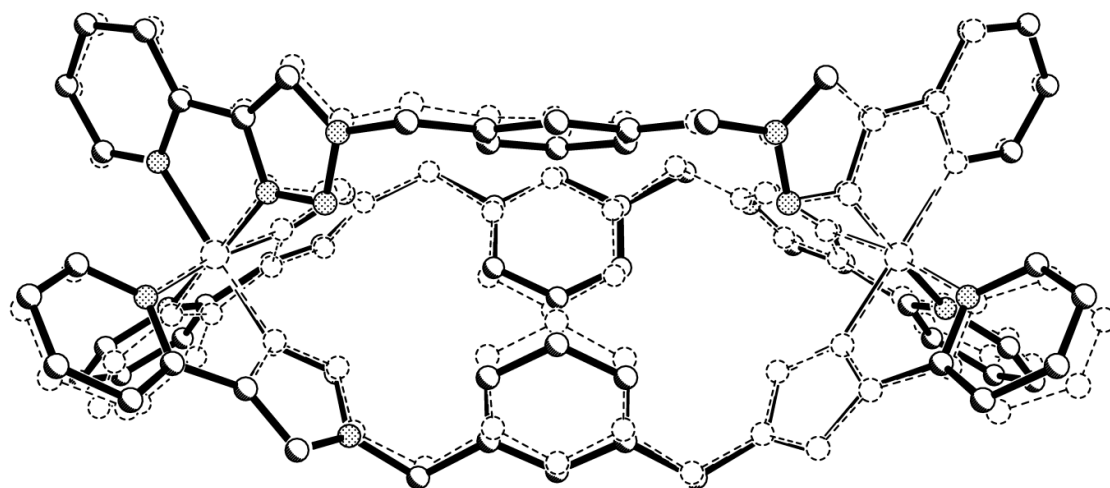

| <b>6b</b>                  | <b>6c</b> | <b>Deviation</b> |
|----------------------------|-----------|------------------|
| N1                         | N21       | 0.028            |
| N2                         | N22       | 0.067            |
| N5                         | N1        | 0.111            |
| N6                         | N2        | 0.127            |
| N9                         | N11       | 0.139            |
| N10                        | N12       | 0.055            |
| Fe1                        | Fe1       | 0.035            |
| N1A                        | N29       | 0.179            |
| N2A                        | N28       | 0.068            |
| N5A                        | N9        | 0.013            |
| N6A                        | N8        | 0.092            |
| N9A                        | N19       | 0.136            |
| N10A                       | N18       | 0.148            |
| Fe1A                       | Fe2       | 0.038            |
| Weighted R.M.S. deviation: |           | 0.1014 Å         |

**Figure S36.** Overlaid X-ray structures of Fe(II) cylinders **1** (solid lines) and **8** (dotted lines).

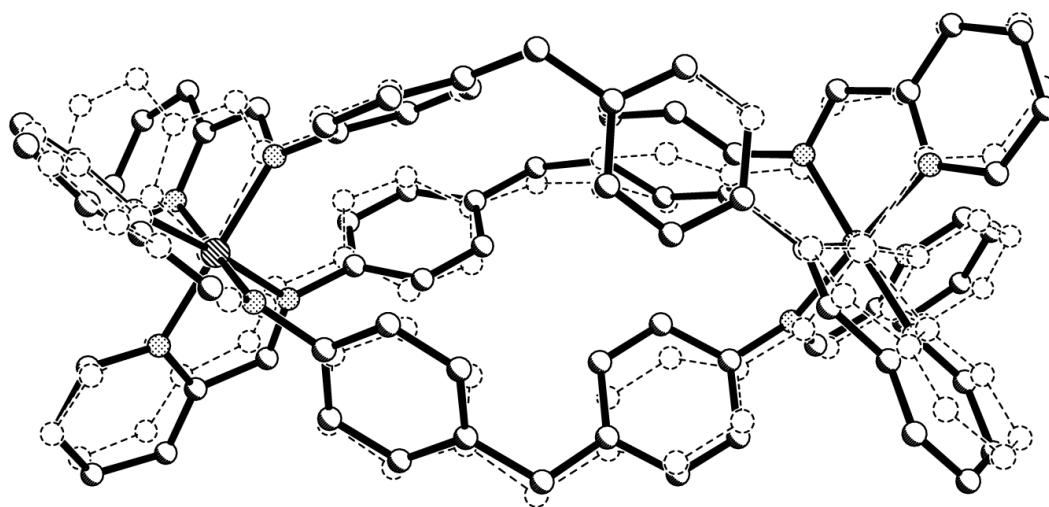

| <b>1</b>                   | <b>8</b> | <b>Deviation</b> |
|----------------------------|----------|------------------|
| N1                         | N4       | 0.312            |
| N3                         | N3       | 0.089            |
| N5                         | N5A      | 0.412            |
| N6                         | N6A      | 0.067            |
| N8                         | N5       | 0.263            |
| N9                         | N6       | 0.154            |
| N10                        | N3A      | 0.291            |
| N12                        | N2       | 0.256            |
| N13                        | N1       | 0.233            |
| N14                        | N4A      | 0.260            |
| N30                        | N2A      | 0.235            |
| N31                        | N1A      | 0.451            |
| Fe1                        | Fe1      | 0.117            |
| Fe2                        | Fe1A     | 0.095            |
| Weighted R.M.S. deviation: |          | 0.2572 Å         |



**Figure S37.** Overlaid X-ray structures of Fe(II) cylinders **8** (solid lines) and **6f** (dotted lines).

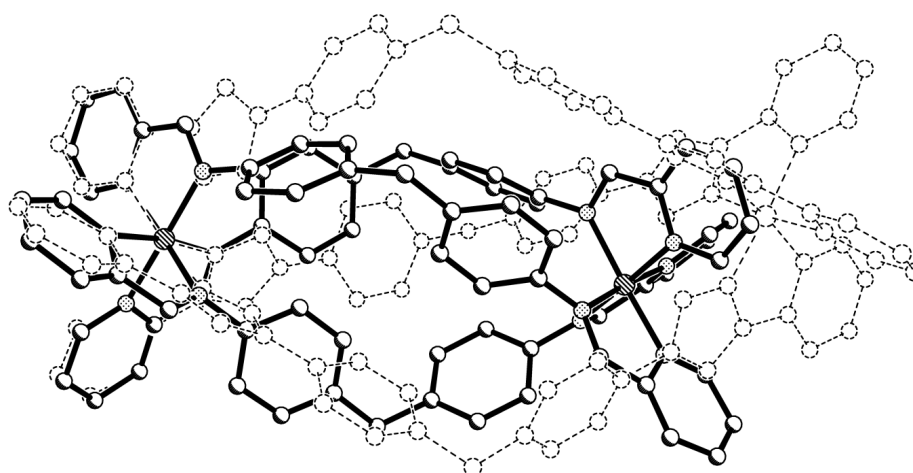

| <b>8</b>                   | <b>6f</b> | <b>Deviation</b> |
|----------------------------|-----------|------------------|
| N1                         | N6        | 0.098            |
| N3                         | N1        | 0.137            |
| N8                         | N16       | 0.155            |
| N9                         | N16       | 0.155            |
| N9                         | N33       | 0.074            |
| N12                        | N11       | 0.188            |
| N13                        | N5        | 0.049            |
| Fe1                        | Fe1       | 0.052            |
| Weighted R.M.S. deviation: |           | 0.1186 Å         |

## 7. Histidine Competition <sup>1</sup>H-NMR Experiments

**Figure S38.** Partial <sup>1</sup>H-NMR of a) **3a** in CD<sub>3</sub>CN/D<sub>2</sub>O (97:3) b) **6a** in CD<sub>3</sub>CN/D<sub>2</sub>O (97:3) and c) **6a** after the addition of histidine in CD<sub>3</sub>CN/D<sub>2</sub>O (97:3).

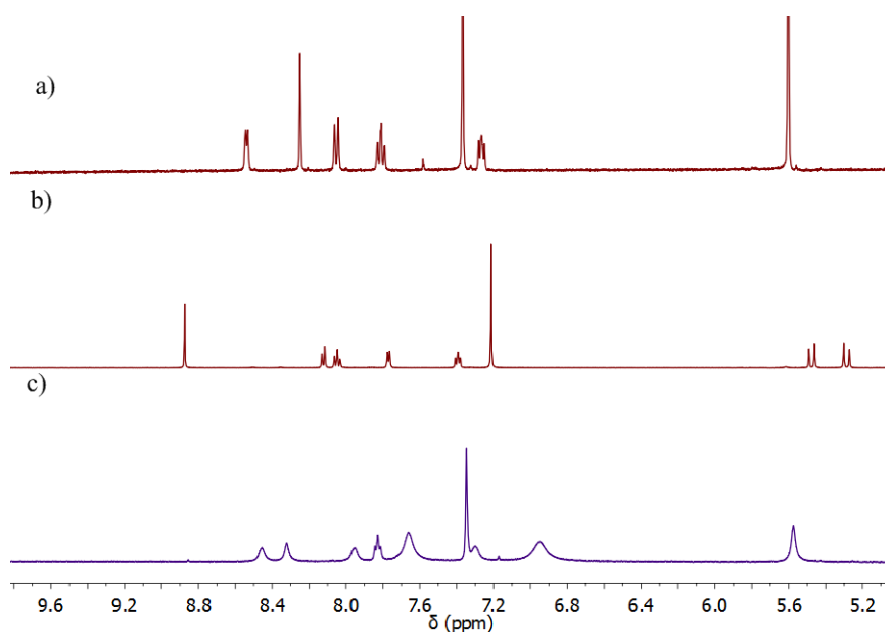

## 8. UV-Vis Spectra

**Figure S39.** UV-Vis spectra (CH<sub>3</sub>CN, 10<sup>-5</sup> M) of Fe(II) model complexes **5a** and **5b**.

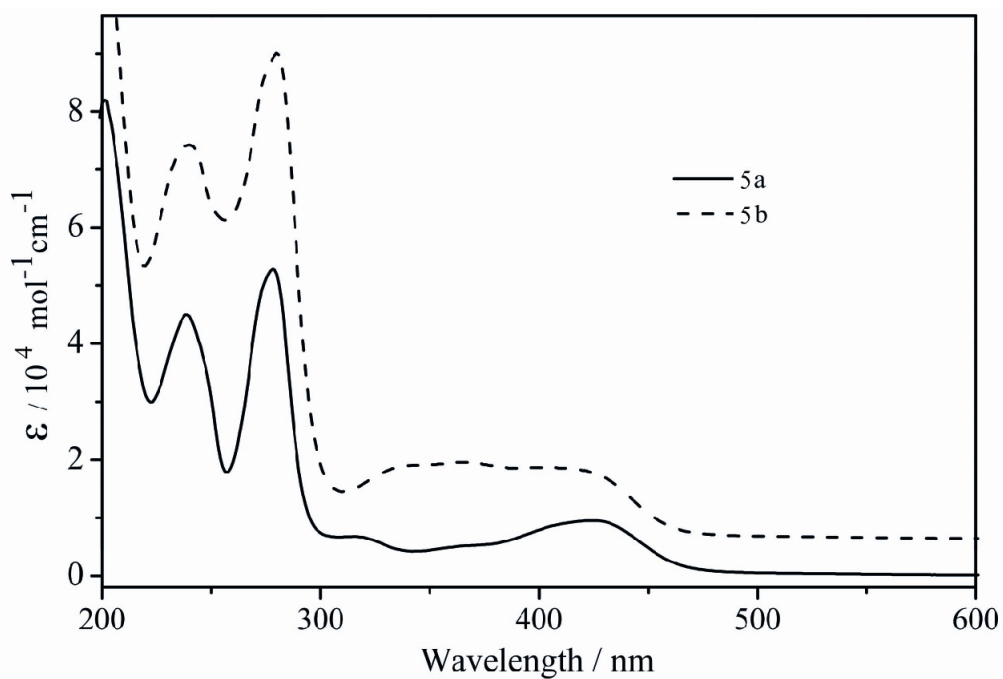

**Figure S40.** UV-Vis spectra (10<sup>-4</sup> M) of the Fe(II) cylinder **6a** in acetonitrile and DMSO.

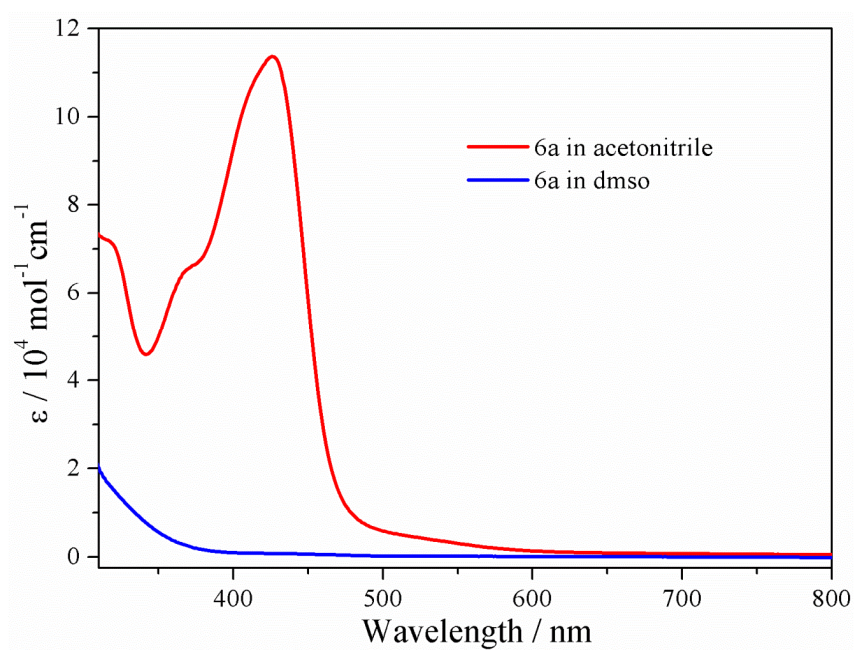

**Figure S41.** Photograph of the Fe (II) cylinder **6a** obtained at  $10^{-4}$  M concentrations in acetonitrile (left) and DMSO (right).

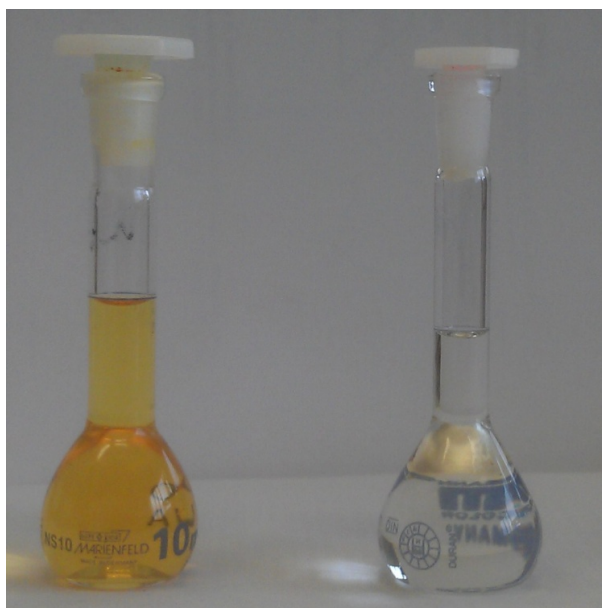

**Figure S42.** Partial  $^1\text{H}$ -NMR spectra (500 MHz,  $d_6$ -DMSO, 298 K) of a) the ligand **3a** and b) the Fe(II) cylinder **6a**.

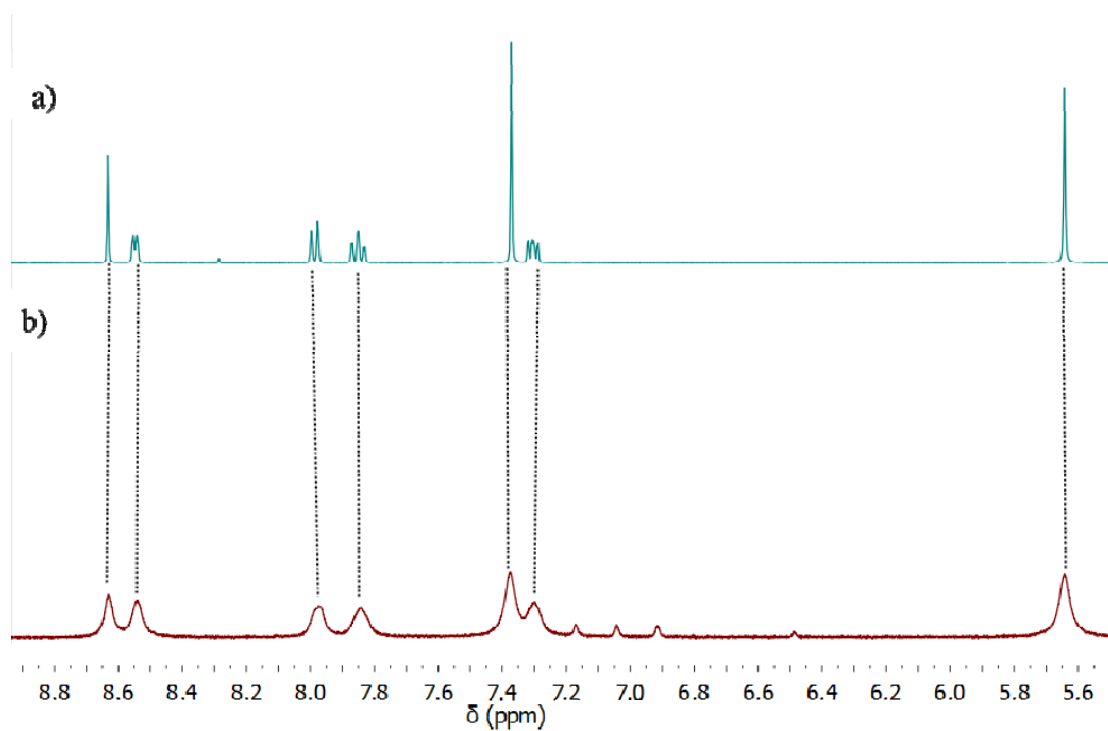

**Figure S43.** UV-Vis spectra ( $\text{CH}_3\text{CN}$ ,  $10^{-4}$  M) of the Fe(II) cylinder **6a** before and after the addition of histidine.

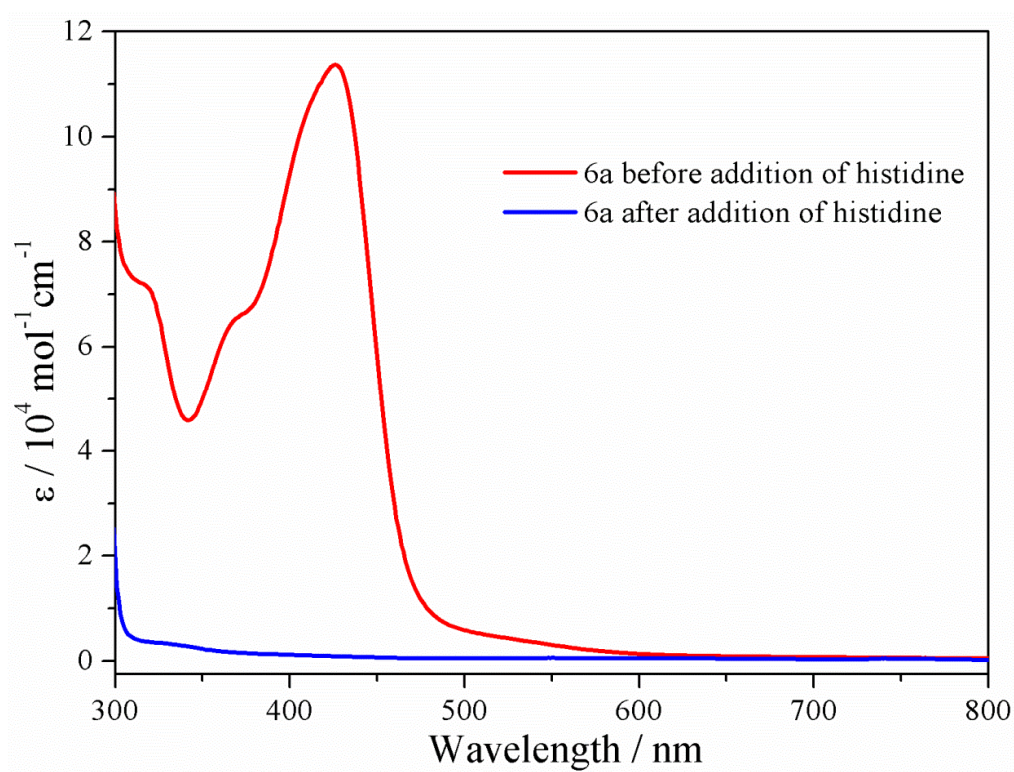

**Figure S44.** Photograph of the Fe(II) cylinder **6a** obtained at  $10^{-4}$  M concentrations before (left) and after the addition of histidine (right) in acetonitrile.

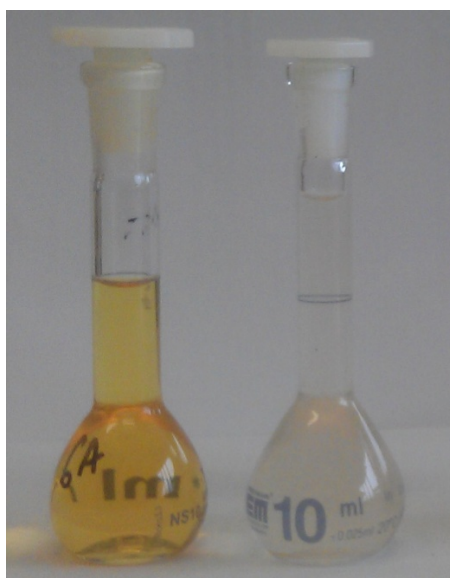



**Figure S45.** UV-Vis spectra ( $10^{-4}$  M) of the Fe(II) cylinder **8** in acetonitrile and DMSO.

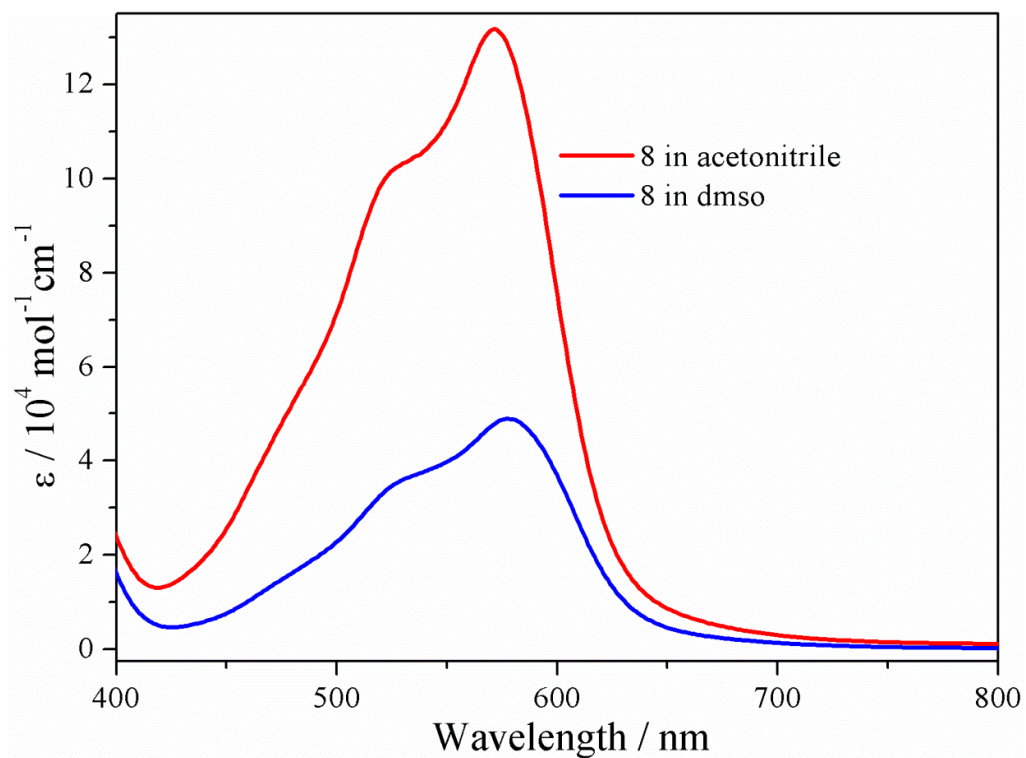

**Figure S46.** Photograph of the Fe(II) cylinder **8** obtained at  $10^{-4}$  M concentrations in acetonitrile (left) and DMSO (right).

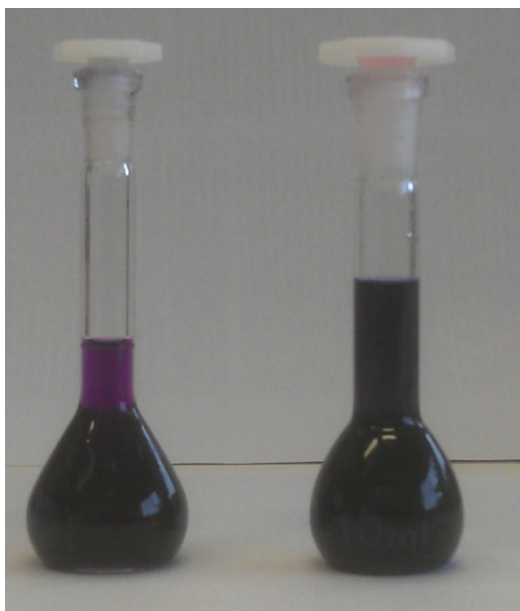

**Figure S47.** UV-Vis spectra ( $\text{CH}_3\text{CN}$ ,  $10^{-4}$  M) of the Fe(II) cylinder **8** before and after the addition of histidine.

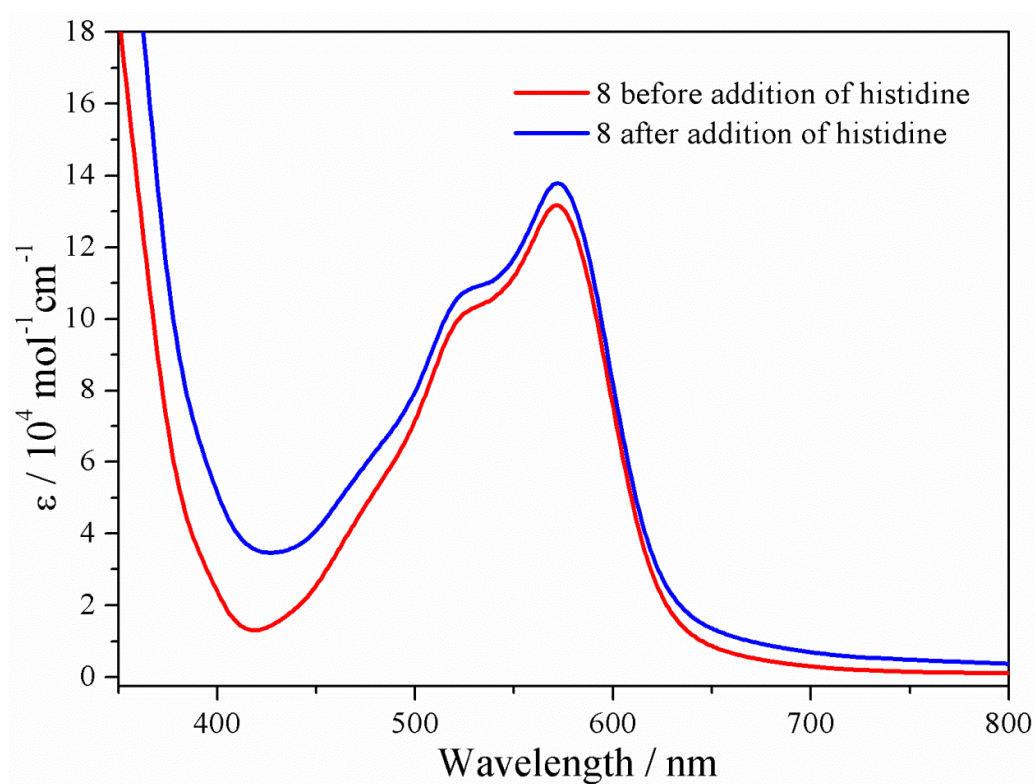

**Figure S48.** Photograph of the Fe(II) cylinder **8** obtained at  $10^{-4}$  M concentrations before (left) and after (right) the addition of histidine in acetonitrile.

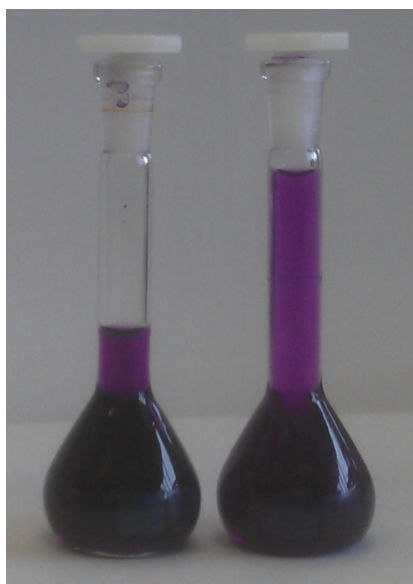

## 9. Disc Diffusion Assay

**Figure S49.** Disc diffusion assay showing the effect of DMSO, Amphotericin-B (100 nmol control), the ligands (**3a–d**, **4a**, 100 nmol) and the Fe(II) complexes (**5a**, **6a–d**, 100 nmol) on *S. cerevisiae*.

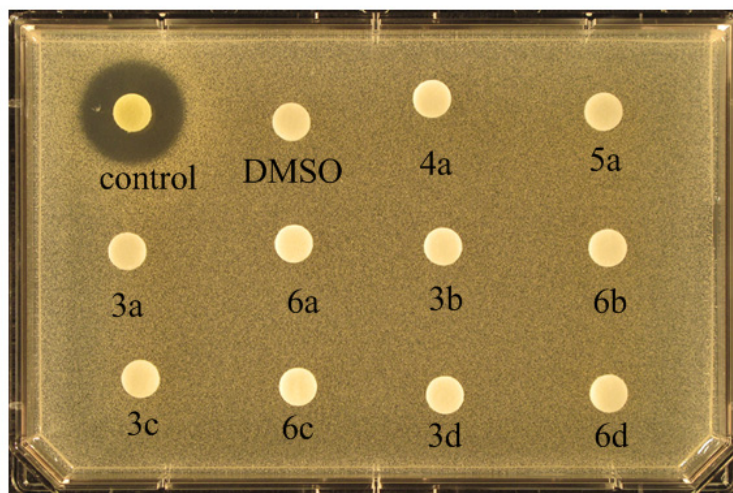

Supplement: s1 [file s1]
